# Supplementary material
Source: PubMed Central journal article supplement (PMC6181207)
Supplement: NIHMS79408-supplement-Supplementary_Information.pdf [file NIHMS79408-supplement-Supplementary_Information.pdf]

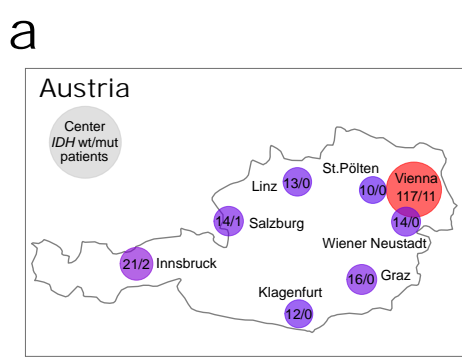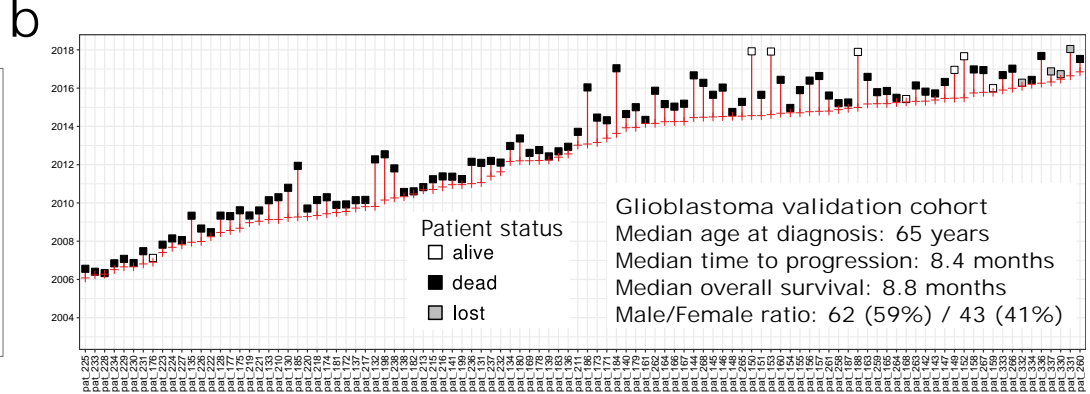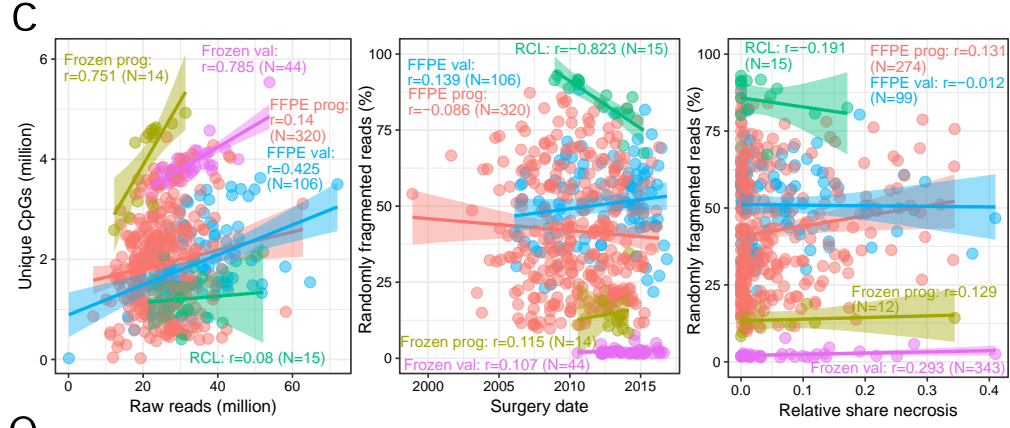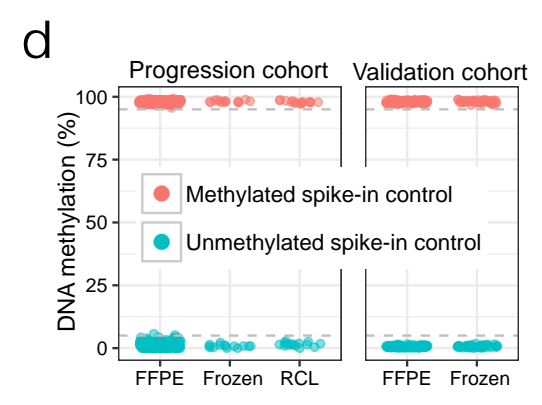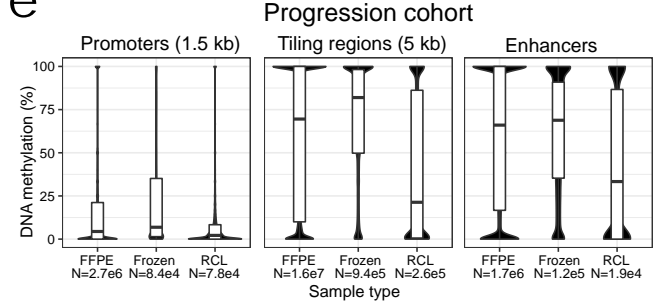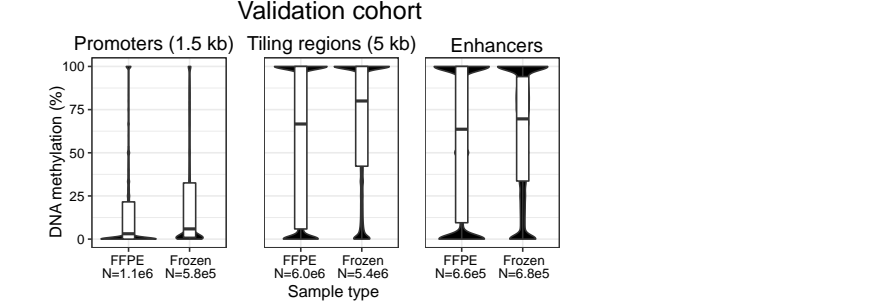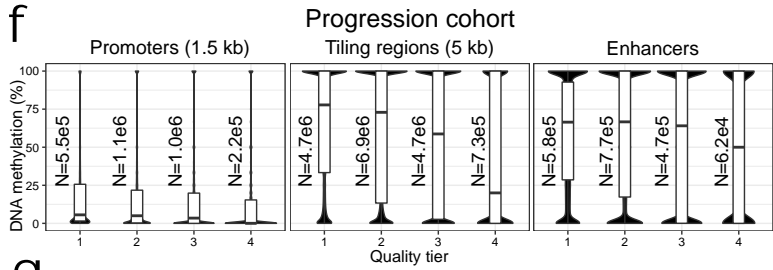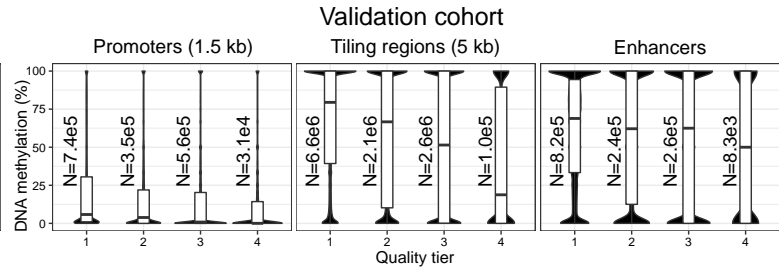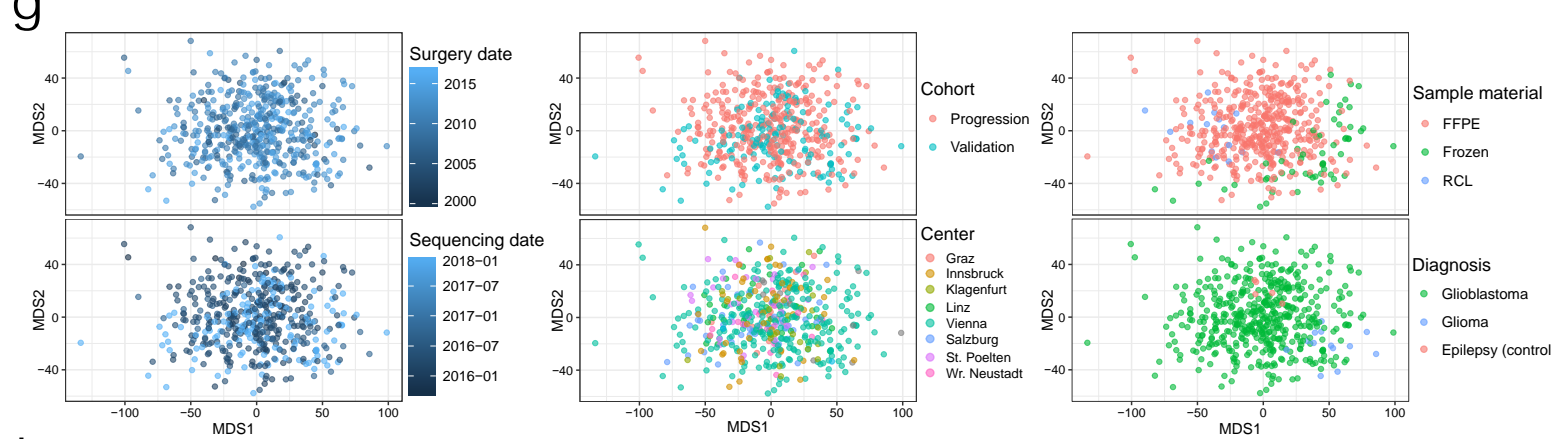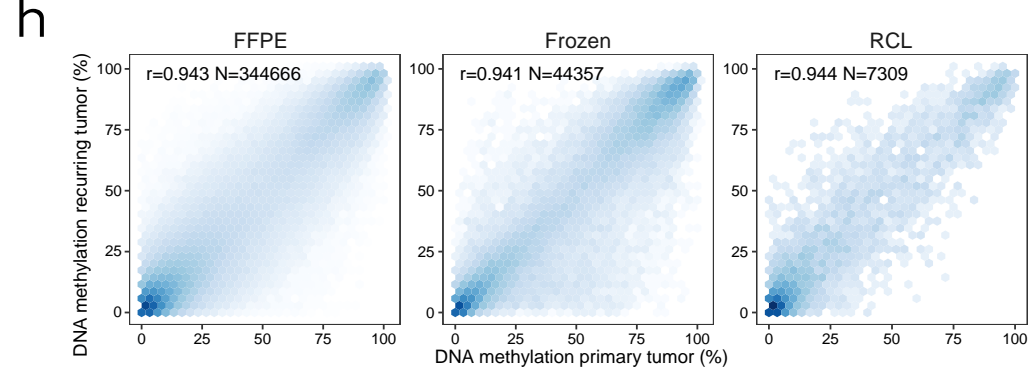

## Supplementary Figure 1

### *RRBS profiling in a national glioblastoma cohort*

- (a) Overview of the clinical centers in Austria that contributed samples and data to this study. The number of *IDH*-wildtype and *IDH*-mutated patients are indicated for each center.
- (b) Overview of the validation cohort, summarizing the disease courses of 105 primary glioblastoma patients with *IDH*-wildtype status and only one tumor resection, ordered by time of first surgery.
- (c) Scatterplots summarizing the RRBS profiling data. A high number of unique CpGs and a low proportion of randomly fragmented reads are indicative of high-quality samples with limited pre-fragmentation of the input DNA. The cohorts (prog: progression, val: validation) and sample types (FFPE: formalin-fixed paraffin-embedded; Frozen: fresh-frozen, RCL: ethanol-based conservation) are indicated by color. *r*: Pearson correlation. *N* denotes the number of samples in each category.
- (d) DNA methylation levels of methylated and unmethylated synthetic spike-in control DNA. Dashed lines indicate DNA methylation levels of 5% and 95%.
- (e,f) Distribution of DNA methylation levels across different types of genomic regions (including all regions covered on average by more than 10 reads per CpG) for different sample types (e) and sample quality tiers (f). The quality tiers (Supplementary Table 2) were defined by the number of unique CpGs detected in each RRBS library (tier 1: more than 3 million; tier 2: between 2 and 3 million; tier 3: between 1 and 2 million; tier 4: below 1 million). Enhancer regions: Astrocyte enhancers as defined by the Roadmap Epigenomics Project<sup>43</sup>. *N* denotes the number of data points (samples × genomic regions).
- (g) Multidimensional scaling plots depicting the relative similarity of all samples included in this study based on all 5-kilobase tiling regions. Colors indicate potential sources of batch effects (surgery date, sequencing date, cohort, center) as well as factors that are known or expected to influence the DNA methylation profiles (sample material, diagnosis).
- (h) Scatterplots depicting the relationship of DNA methylation levels in 5-kilobase tiling regions (containing more than 25 CpGs and covered on average by more than 10 reads per CpG) between primary and recurring tumors for the three different sample types. *r*: Pearson correlation. *N* denotes the number of data points (samples × genomic regions).

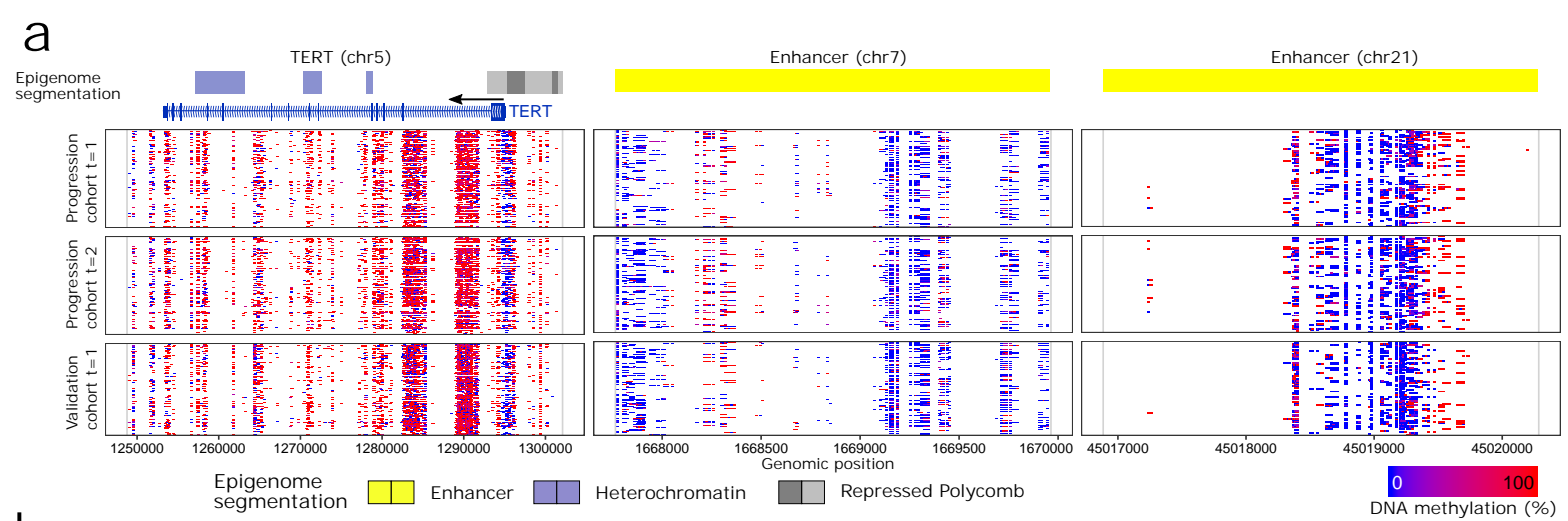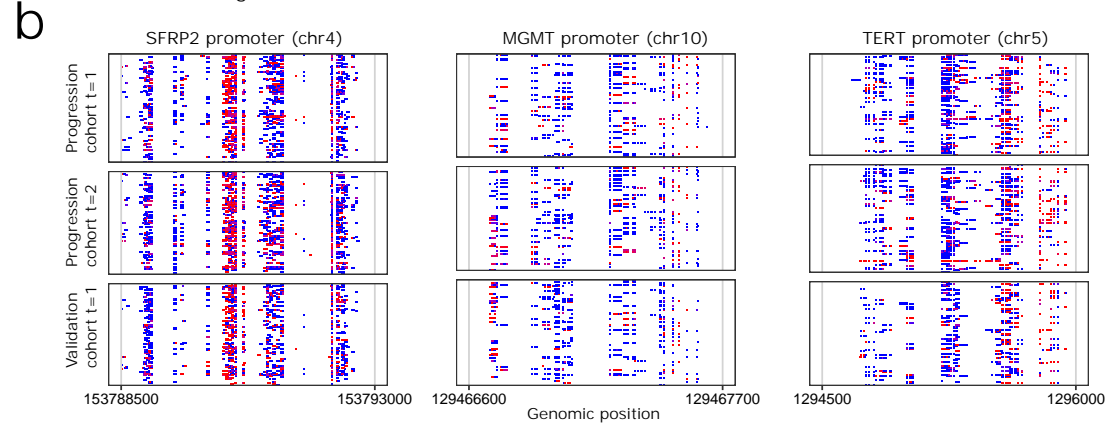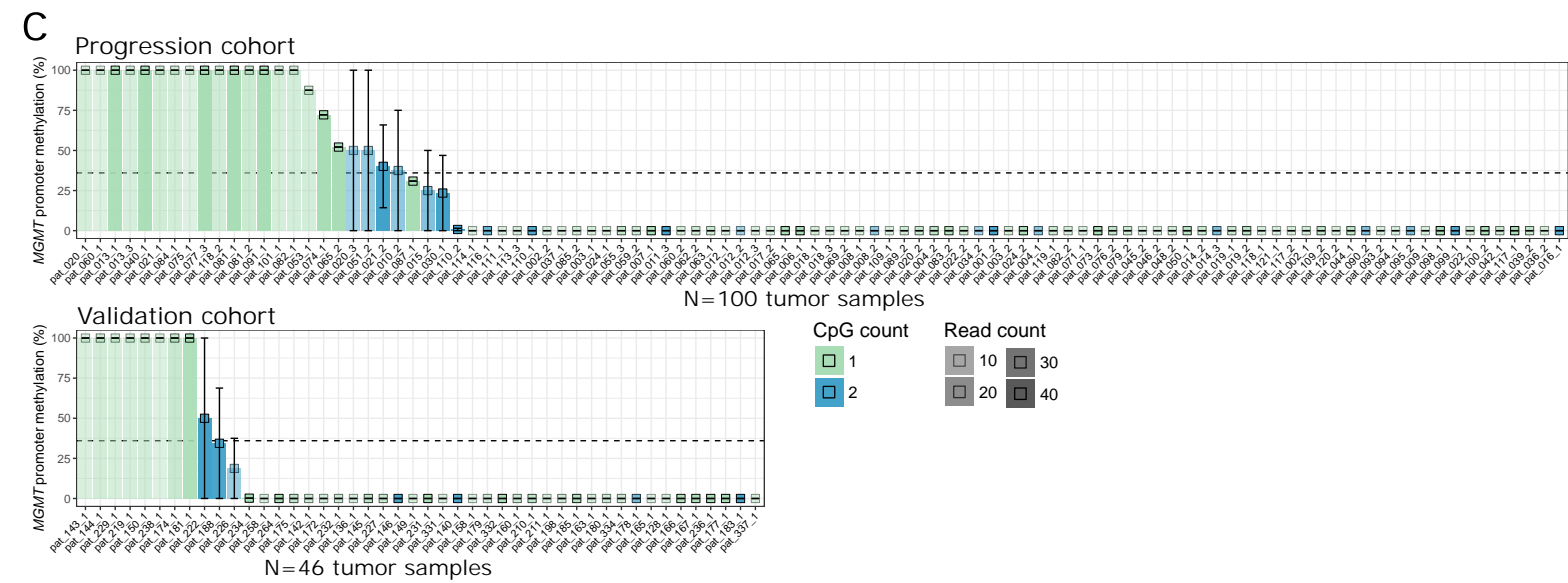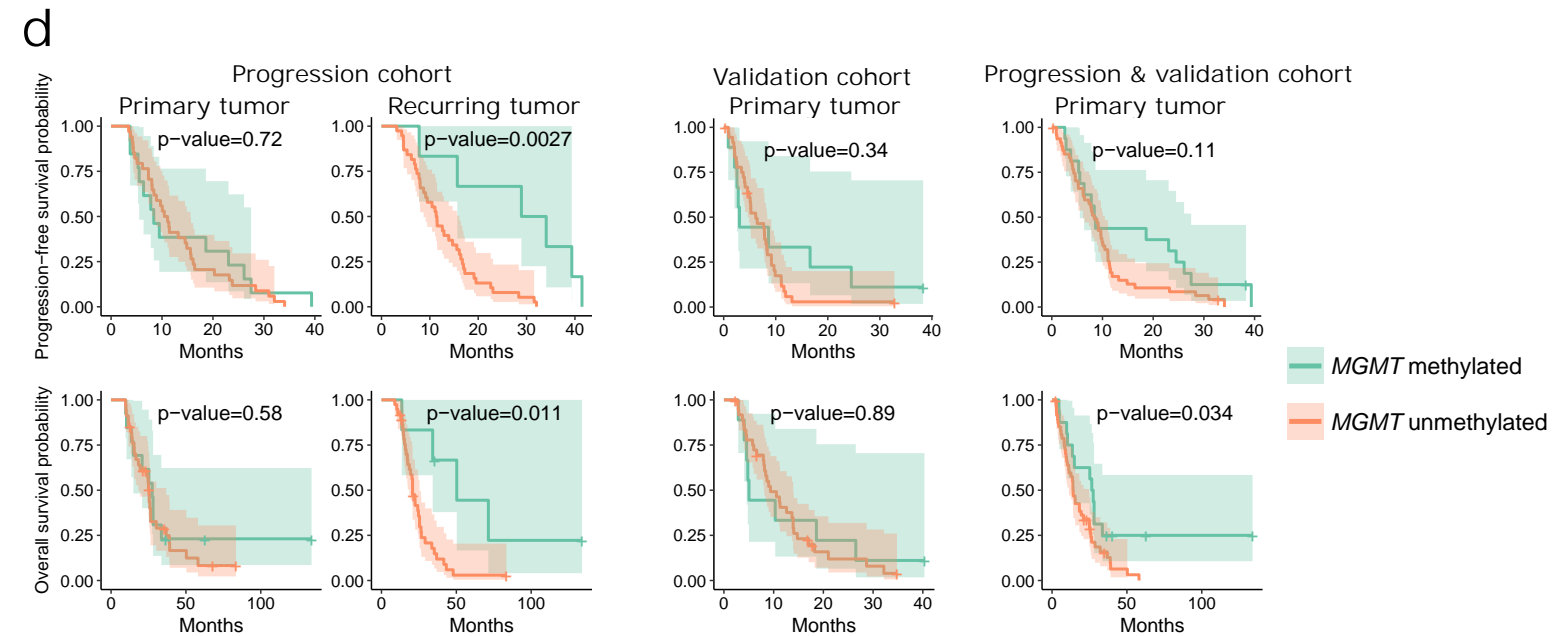

## Supplementary Figure 2

### *DNA methylation heterogeneity at selected genomic loci*

(a) DNA methylation profiles for primary and recurring tumors at one glioblastoma-linked gene locus (*TERT*) and two enhancer loci. Gene annotations and epigenome segmentations for astrocytes were obtained from the WashU EpiGenome Browser (session URL: <http://epigenome-segmentation.computational-epigenetics.org>).

(b) Zoomed-in DNA methylation profiles for promoter regions depicted in Fig. 1c and Supplementary Fig. 2a.

(c) Mean *MGMT* promoter methylation levels averaged across two CpGs (cg12434587 and cg12981137) that have been described as highly informative for identifying methylated *MGMT* promoters (Bady, P., Delorenzi, M. & Hegi, M.E. Sensitivity Analysis of the MGMT-STP27 Model and Impact of Genetic and Epigenetic Context to Predict the MGMT Methylation Status in Gliomas and Other Tumors. *J Mol Diagn* 18, 350-361 (2016)). Error bars indicate the maximum and minimum detected DNA methylation levels in each sample. The dashed line indicates the threshold of 36% (derived from Bady et al.), below which samples are considered unmethylated.

(d) Kaplan-Meier plots showing progression-free and overall survival stratified by *MGMT* promoter methylation status as depicted in panel c. For the validation cohort, recorded progression-free survival time was available only for a subset of patients, while it was estimated to be two months less than the overall survival time for those patients with missing data. In the joint analysis of progression and validation cohort, only CpGs covered by more than five reads were considered, and a mean methylation value above 50% was required to consider the *MGMT* promoter methylated. The number of patients (N) is provided in Supplementary Table 3.

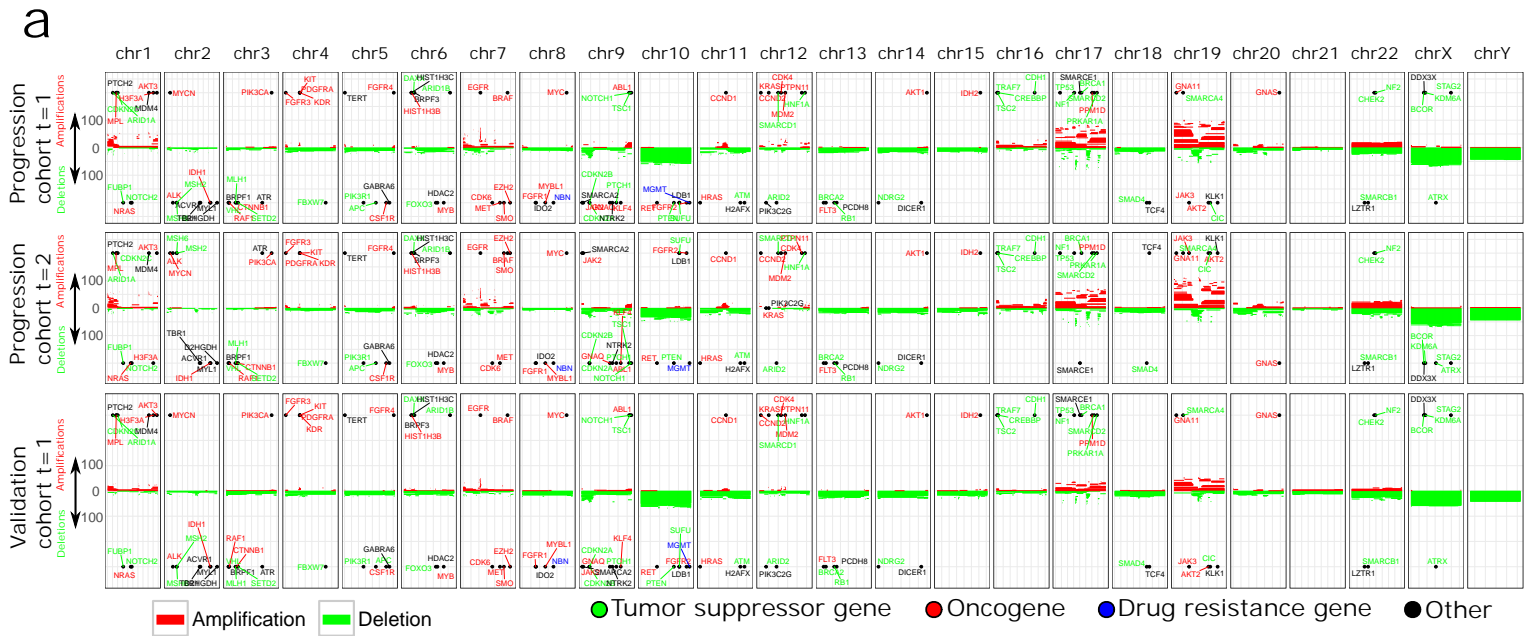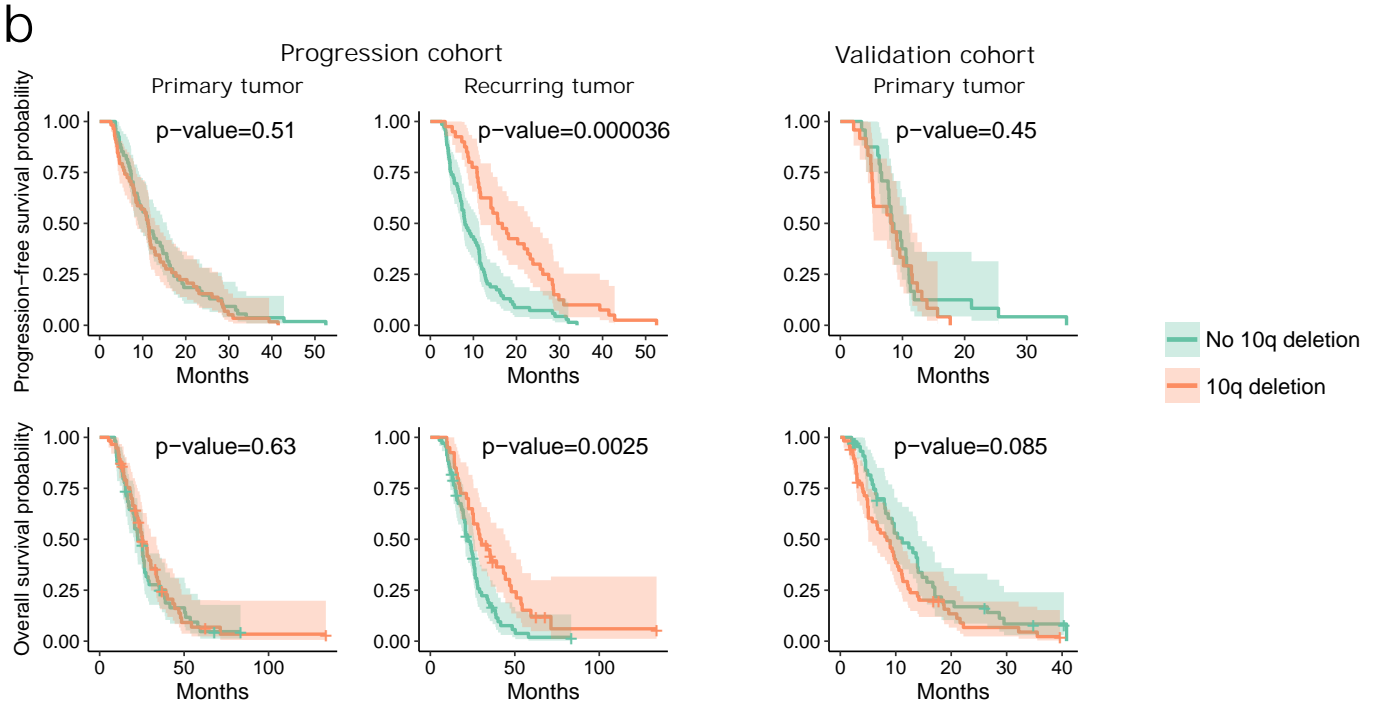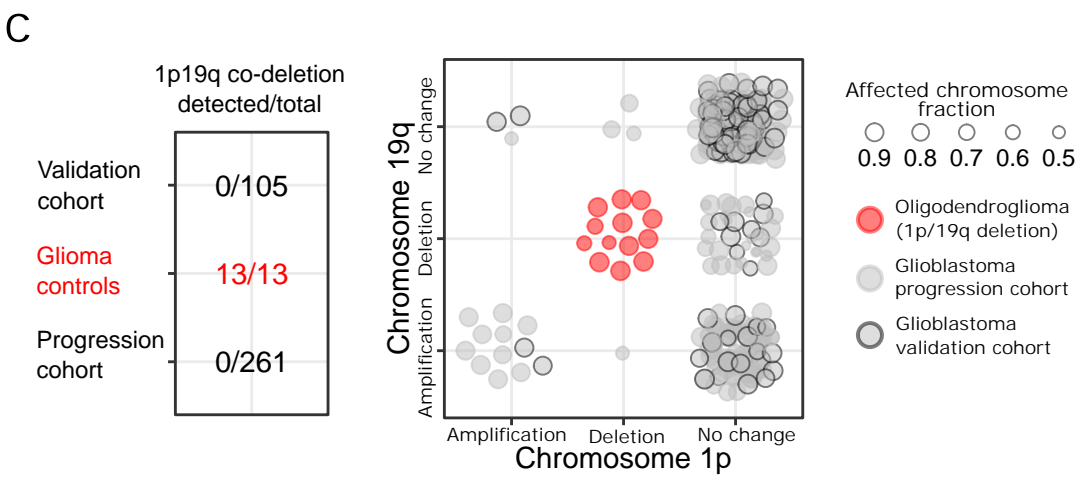

### Supplementary Figure 3

#### *Inference of copy number aberrations from RRBS data*

(a) Overview of the RRBS-based inference of copy number aberrations. Horizontal lines denote inferred amplifications (red) and deletions (green) in individual patients. The height of each stack reflects the total number of aberrations at the respective chromosomal position. Genes with reported relevance in glioblastoma are shown in colors that indicate their putative role as tumor suppressor genes, oncogenes, or drug resistance genes.

(b) Kaplan-Meier plots showing progression-free and overall survival probabilities stratified by chromosome 10q deletion status inferred from the RRBS data. The number of patients (N) is provided in Supplementary Table 3.

(c) Assessment of 1p/19q co-deletion status in the *IDH*-wildtype primary glioblastoma samples and, for comparison, in oligodendroglioma samples with known 1p/19q co-deletion. The size of the bubbles represents the mean fraction of the respective chromosome arms that are affected by the indicated copy number aberrations.

**a**

## Inferred copy number aberrations (chr10)

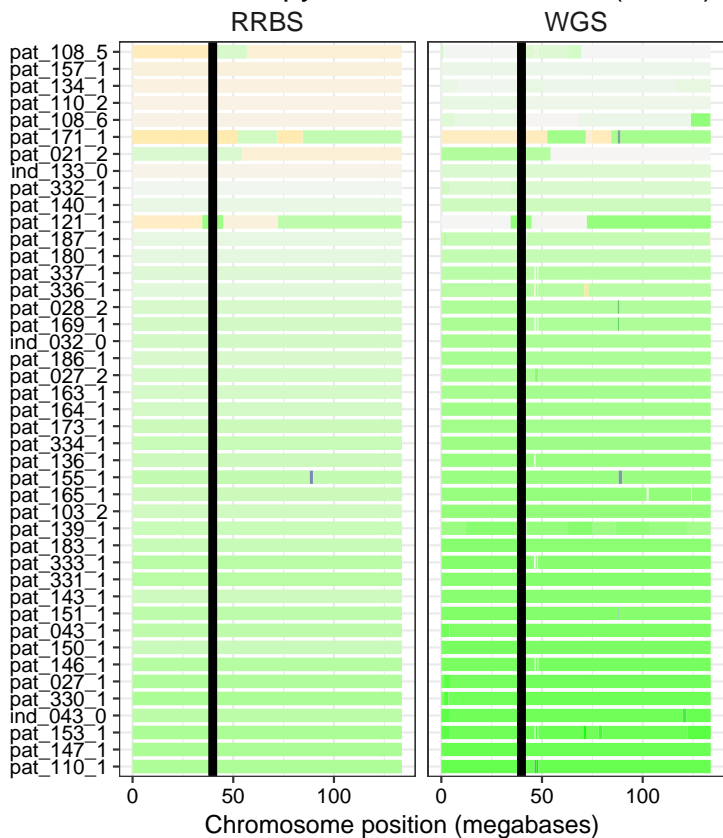

## Inferred copy number aberrations (chr7)

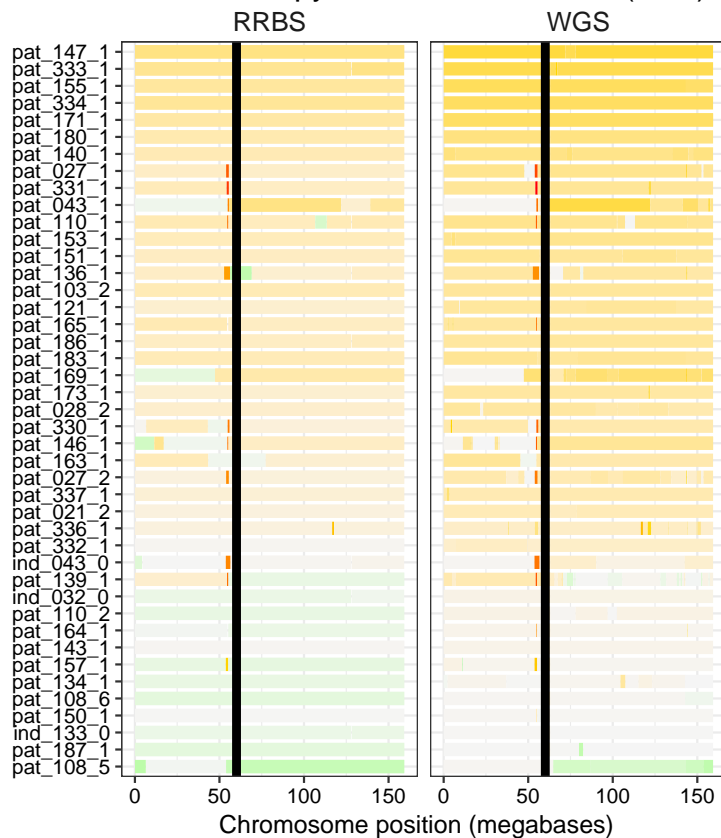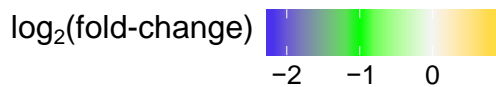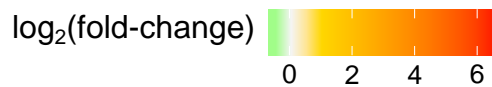**b**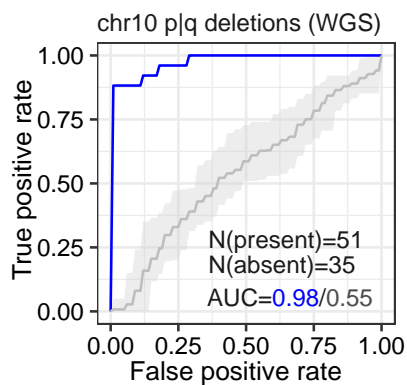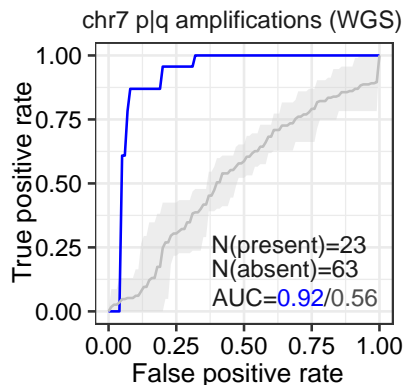

RRBS-based inference  
Shuffled class labels

## Supplementary Figure 4

### *Validation of copy number aberrations inferred from RRBS data*

- (a) Heatmap depicting copy number aberrations on chromosome 10 and chromosome 7 inferred from RRBS data (left) and from low-coverage whole genome sequencing data (right) in 43 glioblastoma samples. The centromere is marked by a vertical black line.
- (b) ROC curves assessing the performance of RRBS-based inference of chromosome 10 deletions (left) and chromosome 7 amplifications (right), evaluated against the low-coverage whole genome sequencing data (absolute  $\log_2$  fold change of 0.5). The number of samples with (N present) and without (N absent) the respective copy number aberration are shown.



a

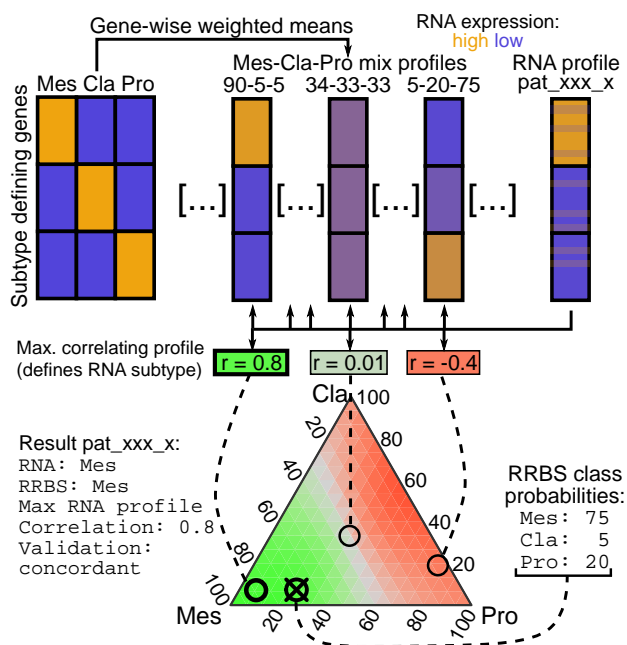

b

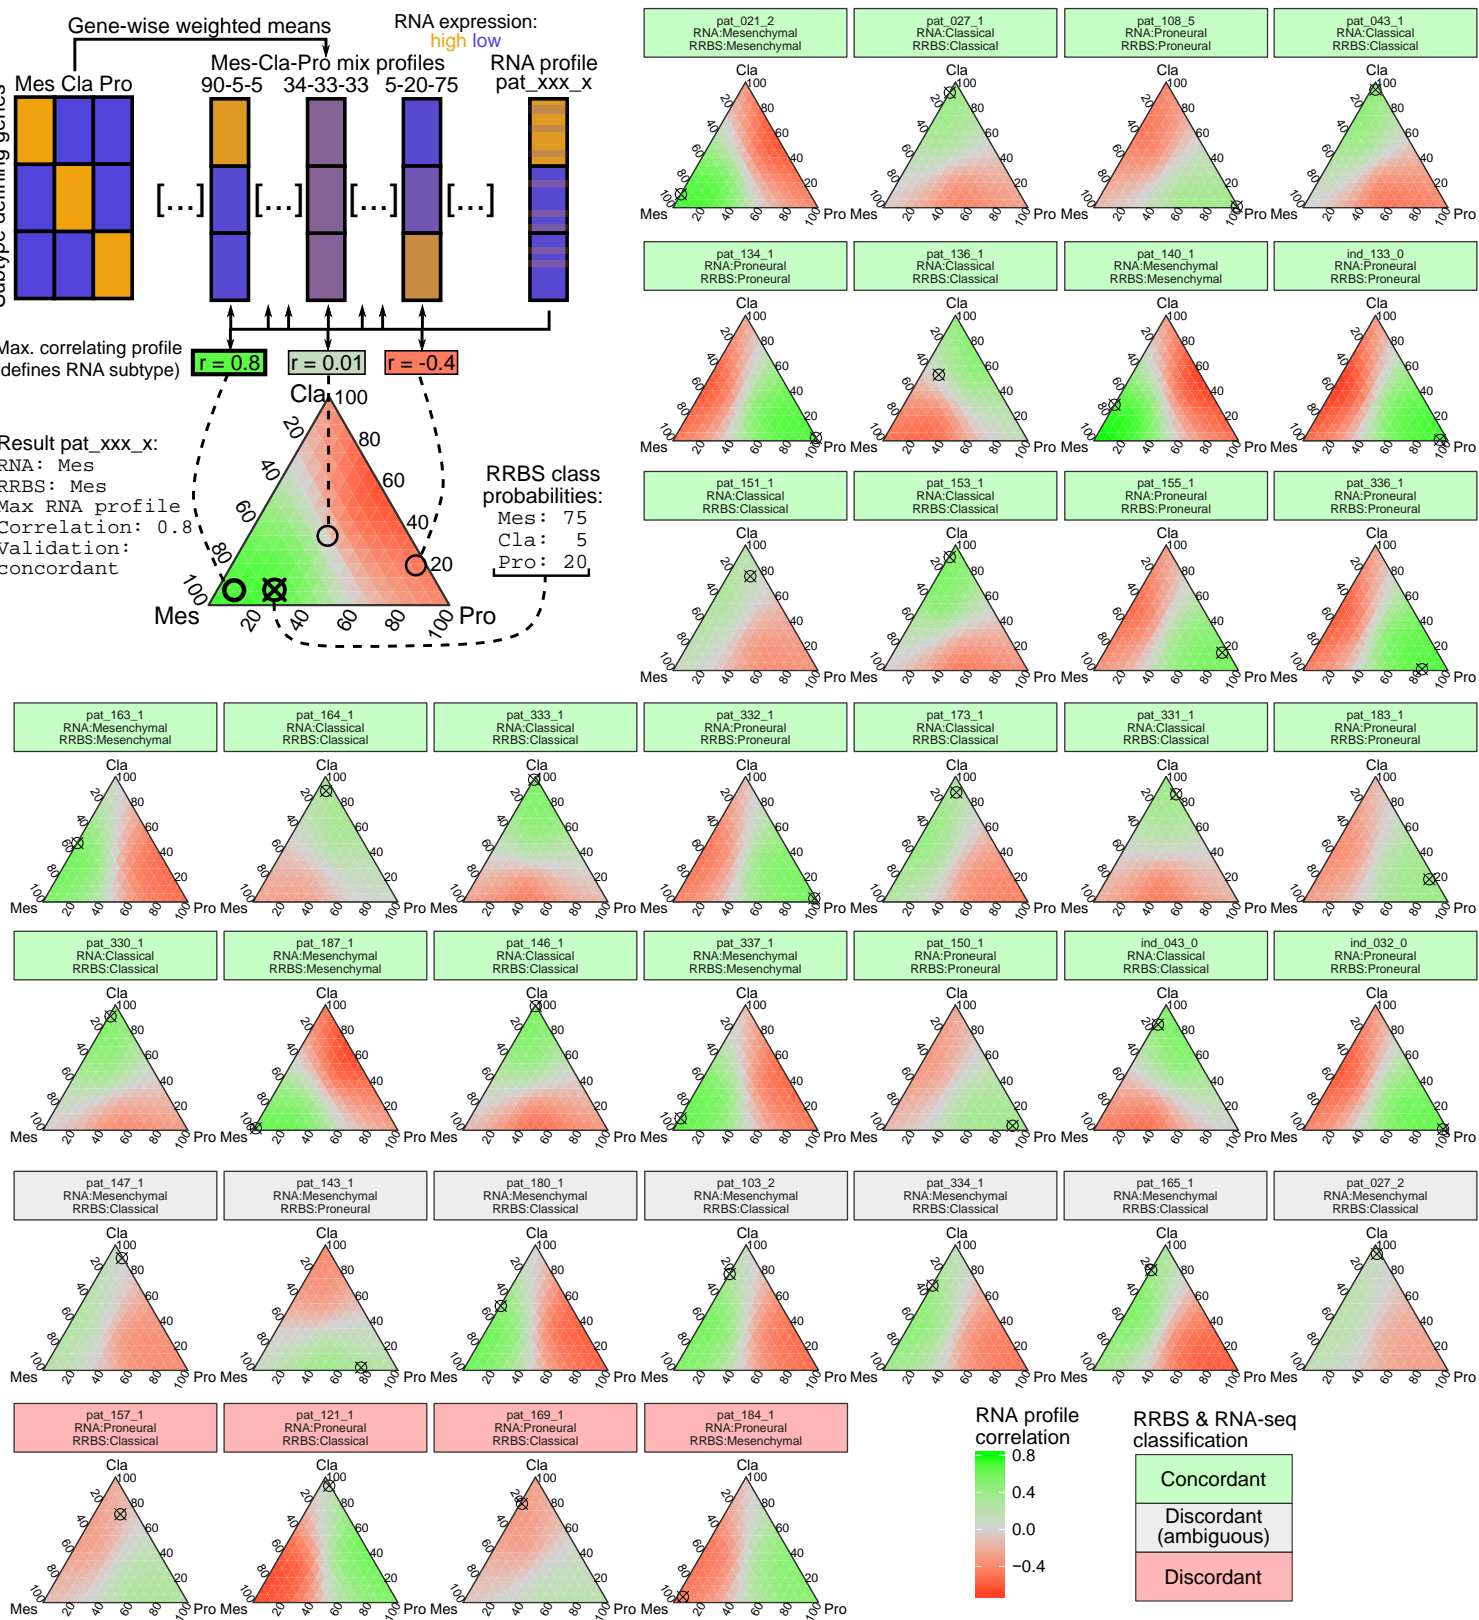

c

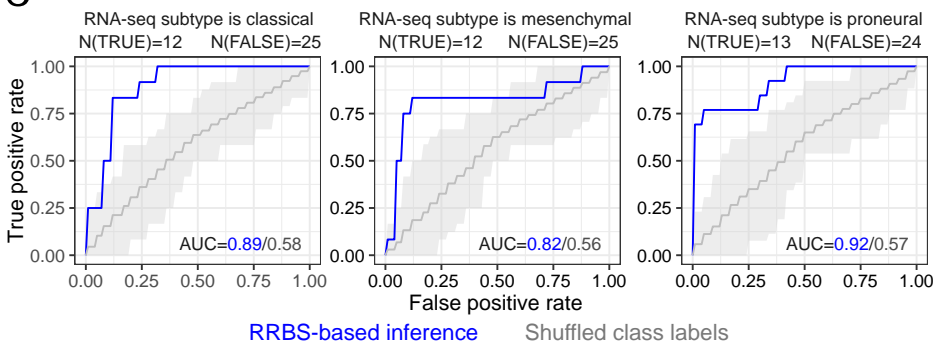

d

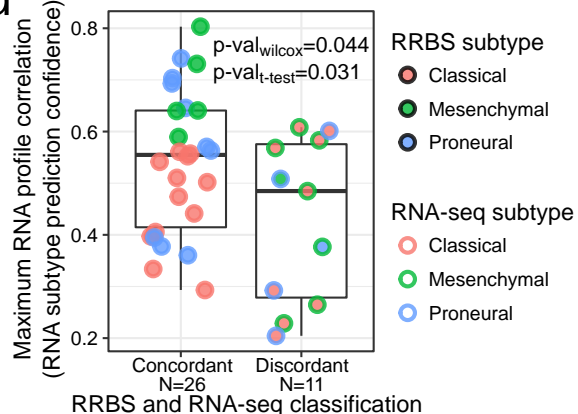

## Supplementary Figure 5

### *Validation of the RRBS-based transcriptional subtype prediction*

(a) Illustration of the approach for validating the RRBS-based prediction of glioblastoma transcriptional subtypes (Mes: Mesenchymal, Cla: Classical, Pro: Proneural) using matched RNA-seq data. Correlation coefficients (green: positive correlation, grey: no correlation, red: negative correlation) with pure and mix profiles based on the RNA-seq data are shown as triangular diagrams. The position of the RRBS-based transcriptional subtype prediction is marked according to the class probabilities obtained from the machine learning classifier.

(b) RNA-seq based and RRBS-based transcriptional subtype predictions for each of the 37 validation samples, plotted as described in panel a. The color of the header bar indicates the validation status for each sample.

(c) ROC curves for RRBS-based prediction of RNA-seq based transcriptional subtype assignments. The number of validation samples assigned to the same subtypes (N[TRUE]) and those that are assigned to a different subtype (N[FALSE]) is shown.

(d) Boxplots showing lower confidence of RNA-seq based subtype assignments for discordantly classified samples compared to concordantly classified samples.  $p\text{-val}_{\text{wilcox}}$ : P-value based on one-sided Wilcoxon rank sum test;  $p\text{-val}_{\text{t-test}}$ : P-value based on one-sided t-test. N denotes the number of tumor samples.

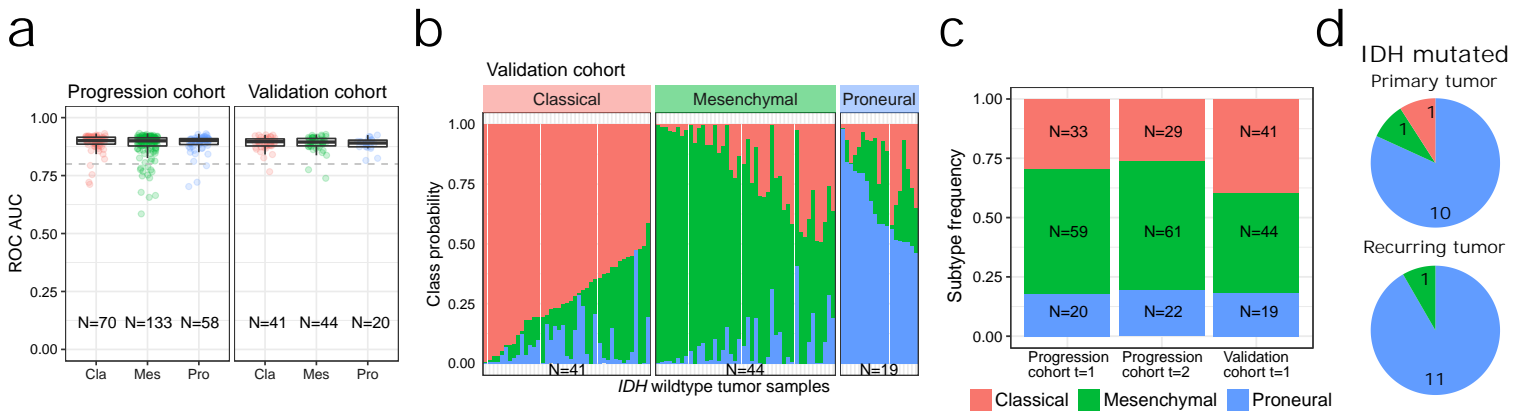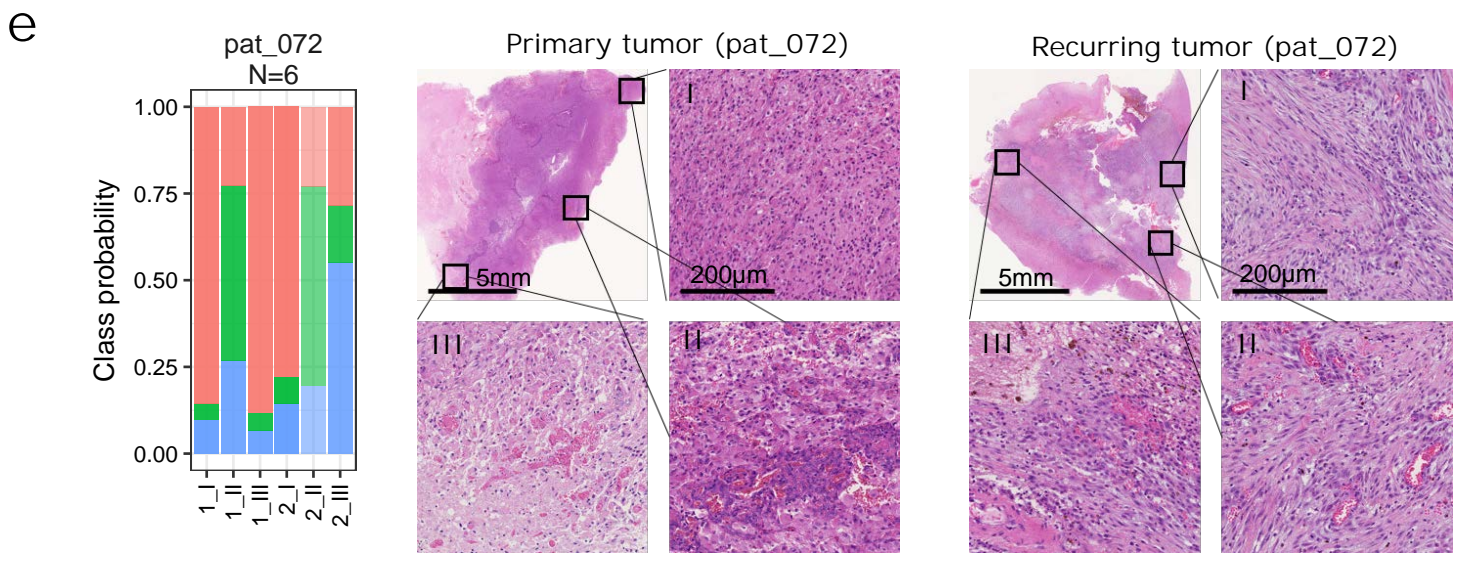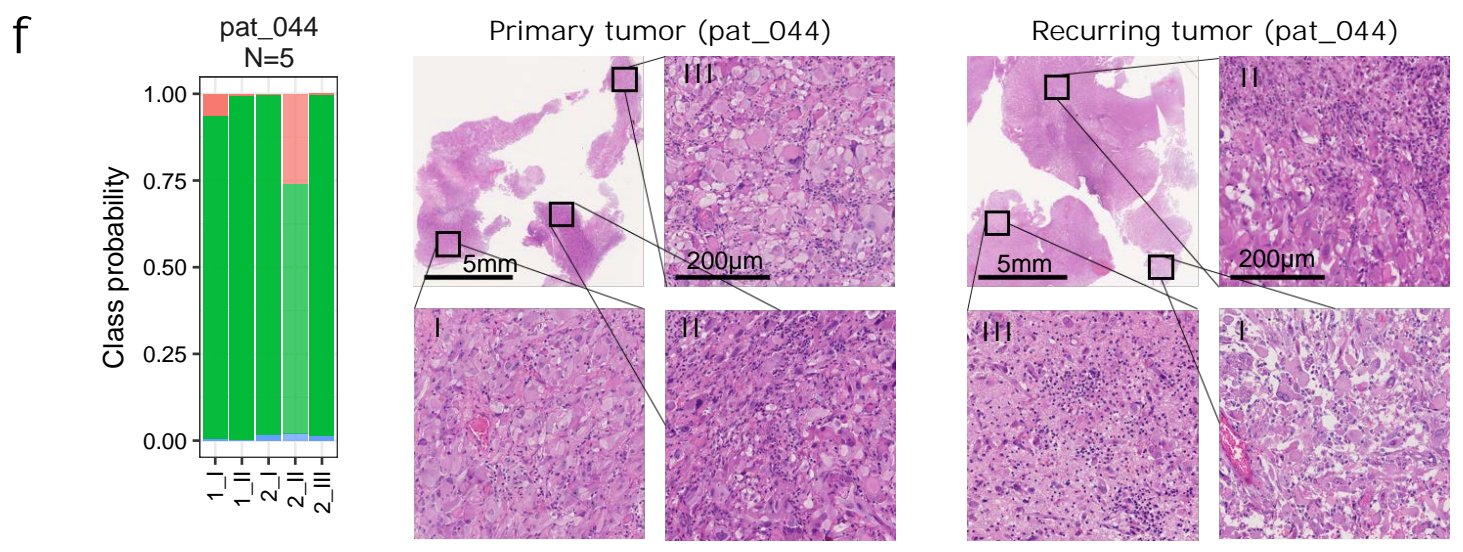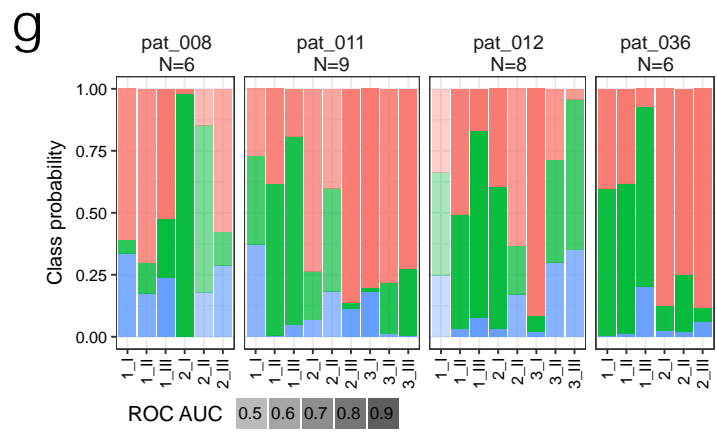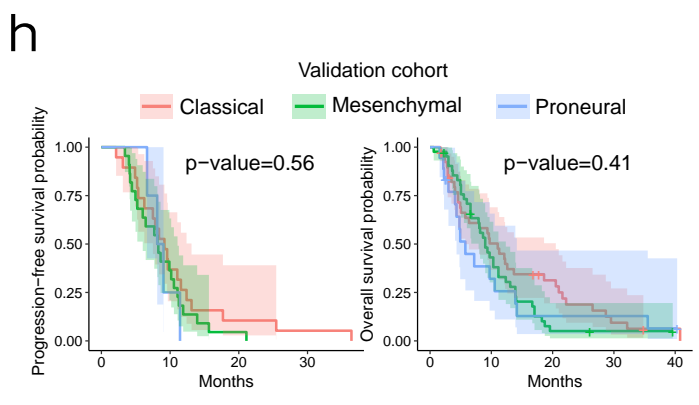

## Supplementary Figure 6

### *Prediction of glioblastoma transcriptional subtypes from RRBS data*

- (a) Sample-wise ROC AUC values on the TCGA training data, providing a confidence measure for the RRBS-based transcriptional subtype predictions. Dashed line: ROC AUC = 0.8
- (b) Transcriptional subtype heterogeneity in the validation cohort samples, as indicated by class probabilities of the RRBS-based subtype classifier. Samples are grouped and ordered by their dominant subtype.
- (c) Distribution of RRBS-based transcriptional subtype predictions for *IDH*-wildtype samples in the progression and validation cohort. N denotes the number of tumor samples.
- (d) Distribution of RRBS-based transcriptional subtype predictions for *IDH*-mutated samples.
- (e, f, g) Distribution of class probabilities across different regions of the same tumor (indicated by Roman numbers) and across different surgeries (indicated by Arabic numbers). For two of the six patients with multisector samples, matched H&E stains are shown for the tumor regions from which the multi-sector samples originated (section III of the primary tumor of patient 044 was excluded from subtype prediction due to low CpG coverage). N denotes the number of tumor samples displayed for each patient.
- (h) Kaplan-Meier plots showing progression-free and overall survival probabilities for patients in the validation cohort stratified by RRBS-based transcriptional subtype predictions. Only patients for which the sample-specific subtype classifier achieved high accuracy (ROC AUC > 0.8) were included in the analyses. The number of patients (N) is provided in Supplementary Table 3.



**a**

## Validation cohort

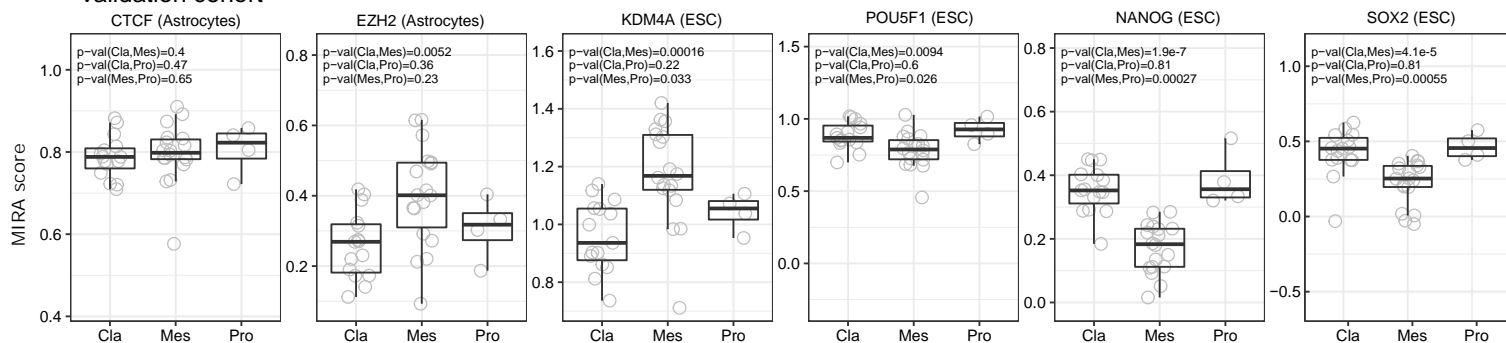**b**

## EZH2 (Astrocytes)

## NANOG (ESCs)

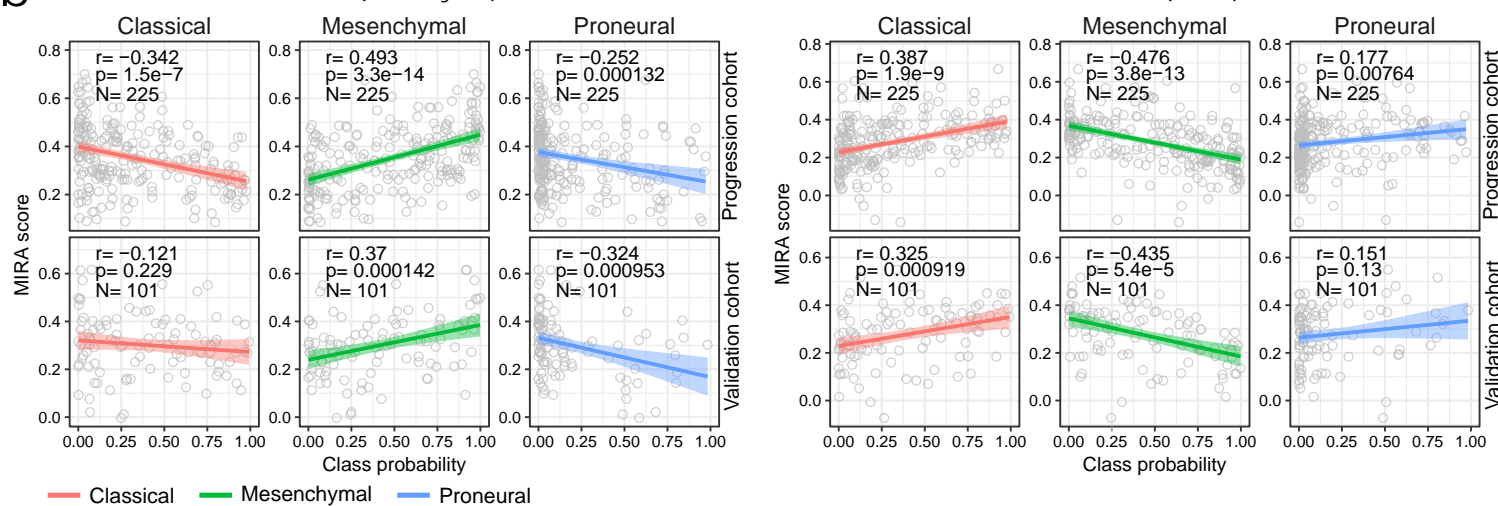**c**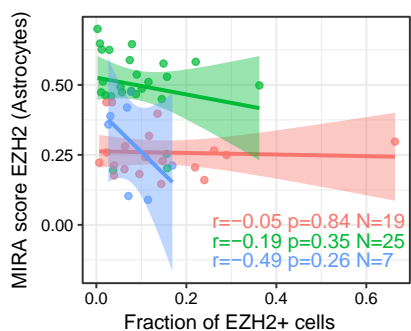**d**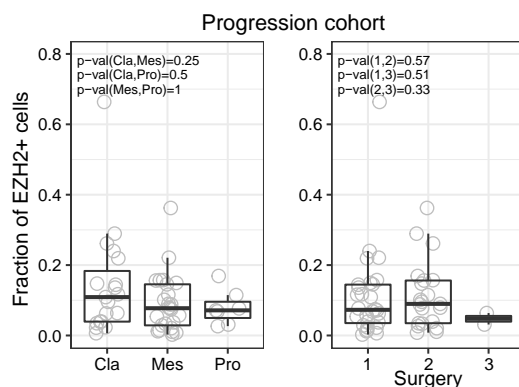**e**

## Progression cohort

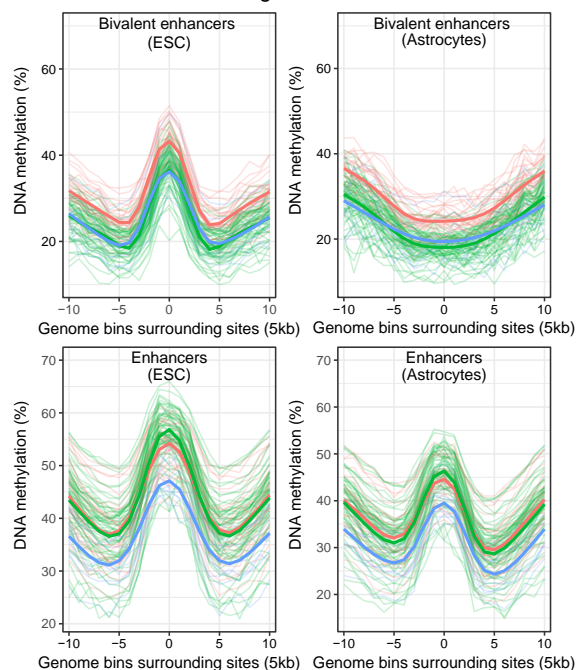**f**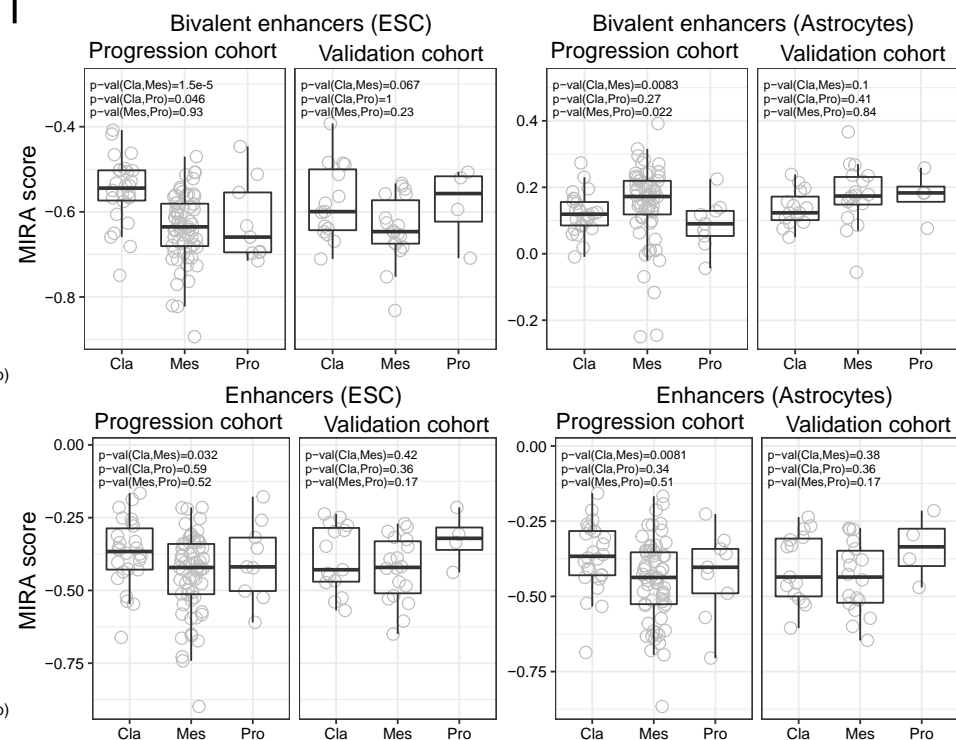

## Supplementary Figure 7

### *Association between transcriptional subtypes and (epi)genome regulation*

(a) MIRA scores in the validation cohort for three sets of transcription factor binding sites that were hypomethylated in the mesenchymal subtype of the progression cohort (CTCF, EZH2, KDM4A) and for the binding sites of three key regulators of pluripotency (POU5F1(OCT4), NANOG, SOX2).

(b) Scatterplots displaying the relationship between MIRA scores for the indicated transcription factors (EZH2, NANOG) and class probabilities for the indicated transcriptional subtypes. r: Pearson correlation, p: p-value.

(c) Scatterplot displaying the relationship between MIRA scores for EZH2 in astrocytes and the fraction of EZH2 positive cells as determined by quantitative immunohistochemistry. r: Pearson correlation, p: p-value.

(d) Fraction of EZH2 positive cells as measured by quantitative immunohistochemistry across transcriptional subtypes (left) and across tumor resections (right).

(e, f) DNA methylation profiles (e) and corresponding MIRA scores (f) for four sets of genomic regulatory regions (enhancers and bivalent enhancers in embryonic stem cells as well as astrocytes, as defined by the Roadmap Epigenomics Project<sup>43</sup>), compared across the three transcriptional subtypes.

Only samples for which the sample-specific subtype classifier achieved high accuracy (ROC AUC > 0.8) were included in the analysis for panels b, e, and f. In the scatterplots (panels b, c), N denotes the number of tumor samples in each analysis. The number of tumor samples (N) in the association tests (panels a, d, f) is provided in Supplementary Table 4.

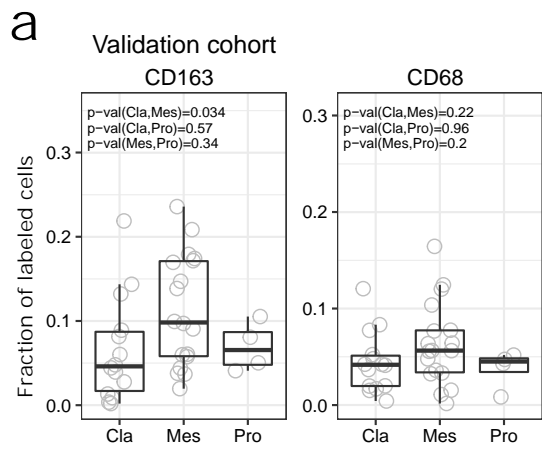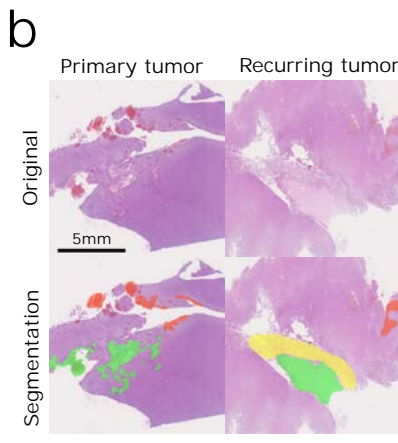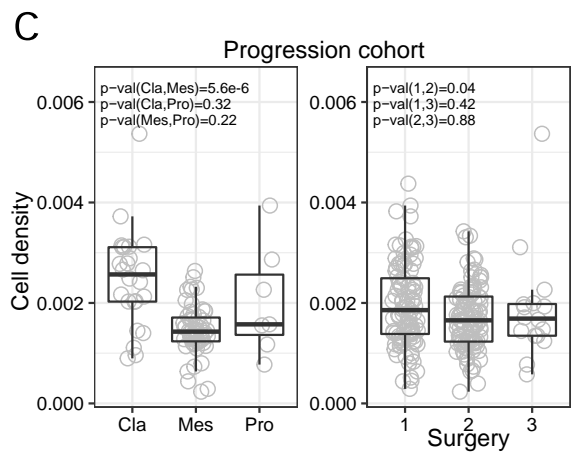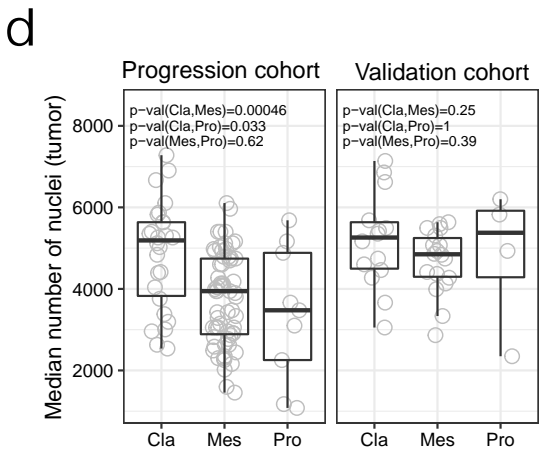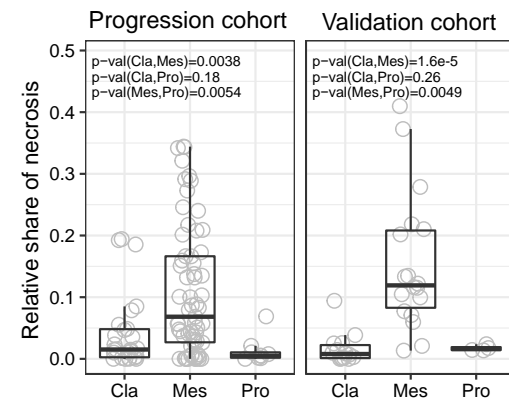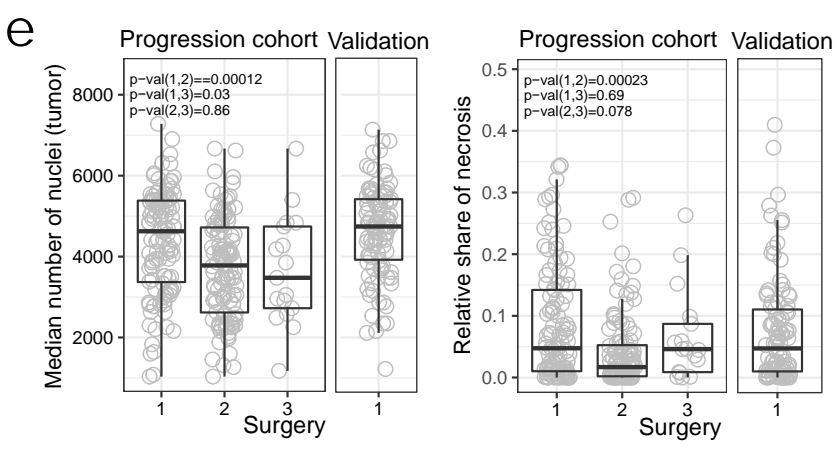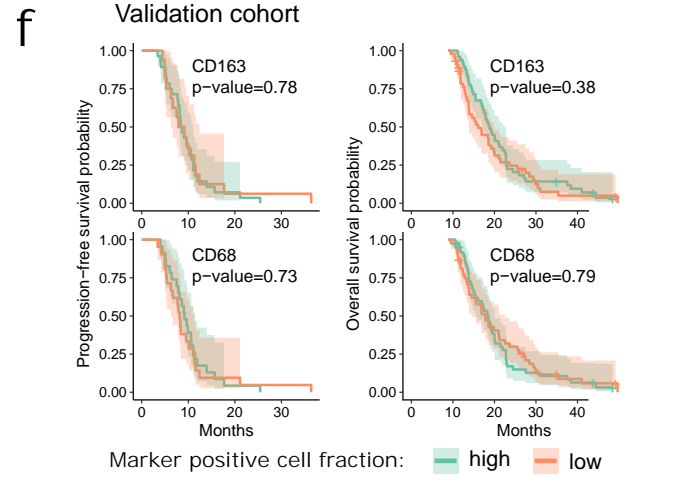

## Supplementary Figure 8

### *Association of histopathological tumor properties with transcriptional subtypes and disease progression*

(a) Level of tumor-infiltrating immune cells (CD163, CD68) as measured by quantitative immunohistochemistry in the validation cohort, compared across transcriptional subtypes.

(b) Segmented H&E stains illustrating the quantification of histopathological tumor properties (red: hemorrhage, green: necrosis, yellow: meningeal scarring).

(c, d, e) Histopathological tumor properties compared across transcriptional subtypes and across tumor resections (1: primary tumor, 2: recurring tumor, 3: second recurrence).

(f) Kaplan-Meier plots showing progression-free and overall survival for patients in the validation cohort stratified by the level of CD163 positive and CD68 positive immune cell infiltration. The number of patients (N) is provided in Supplementary Table 3.

The number of tumor samples (N) for the association tests (panels a, c, d, e) is provided in Supplementary Table 4.



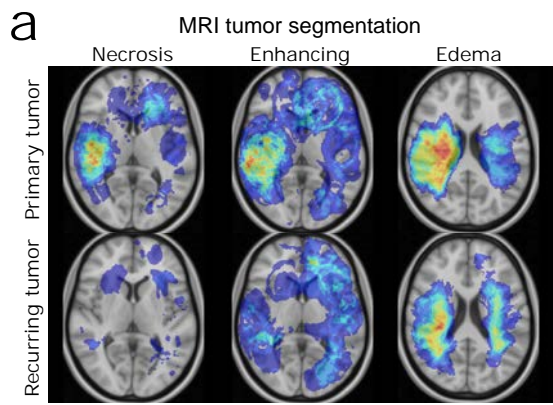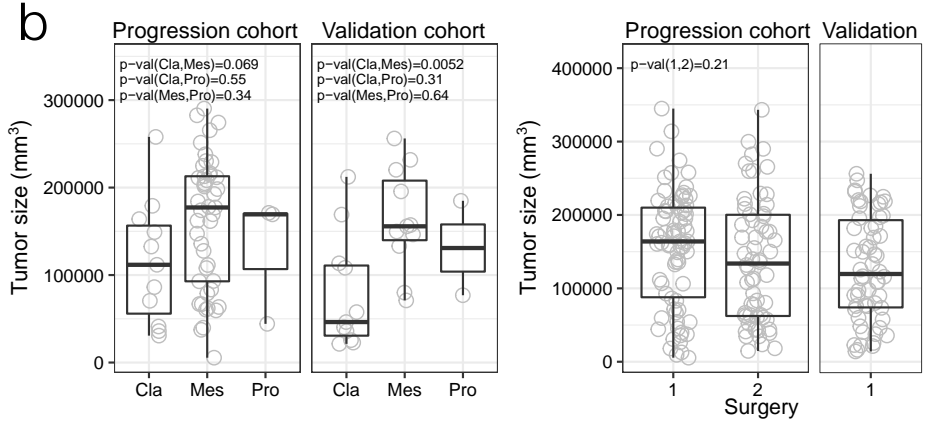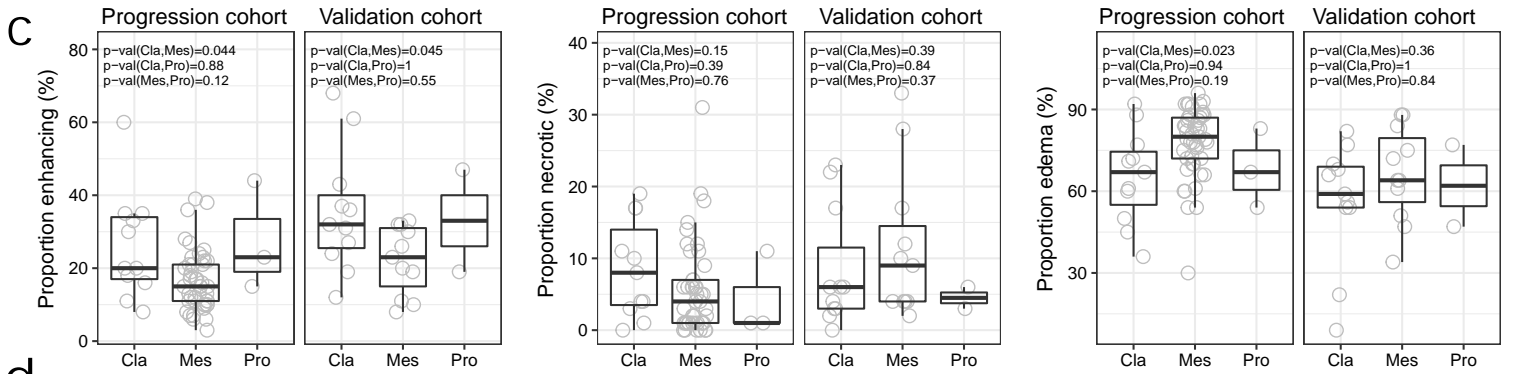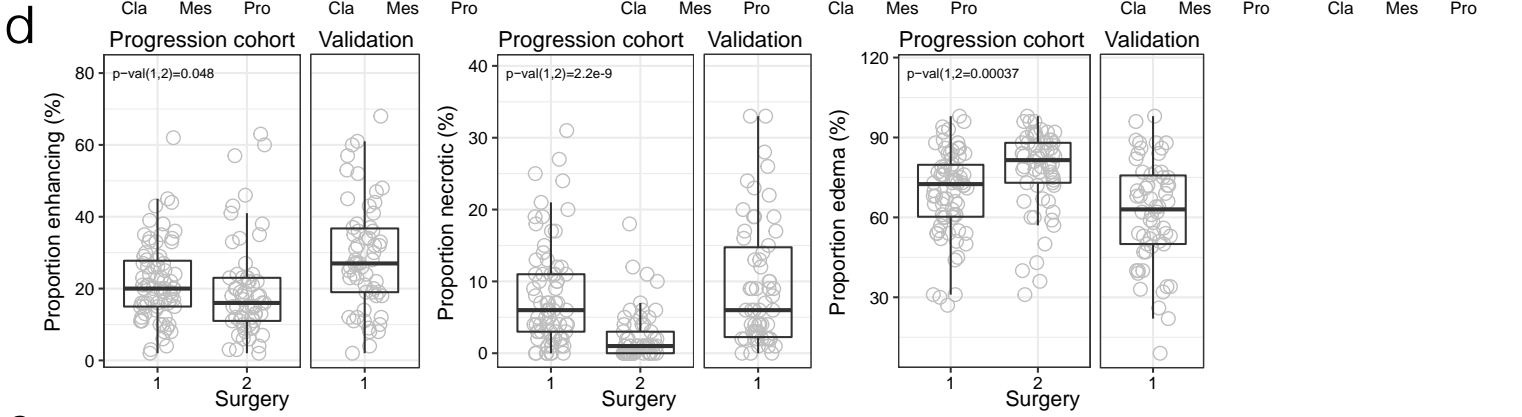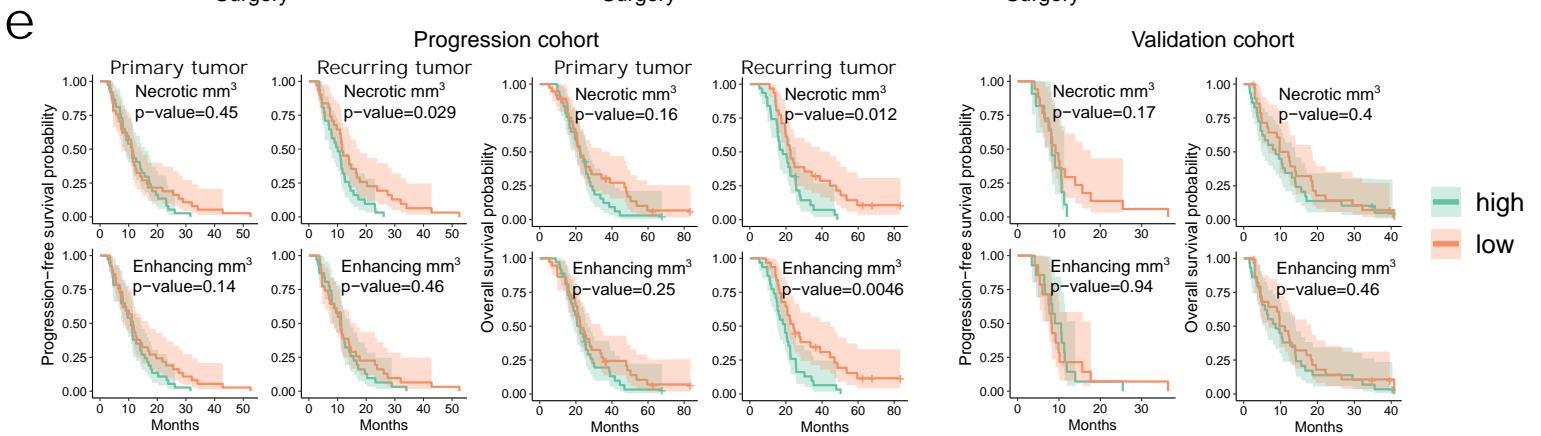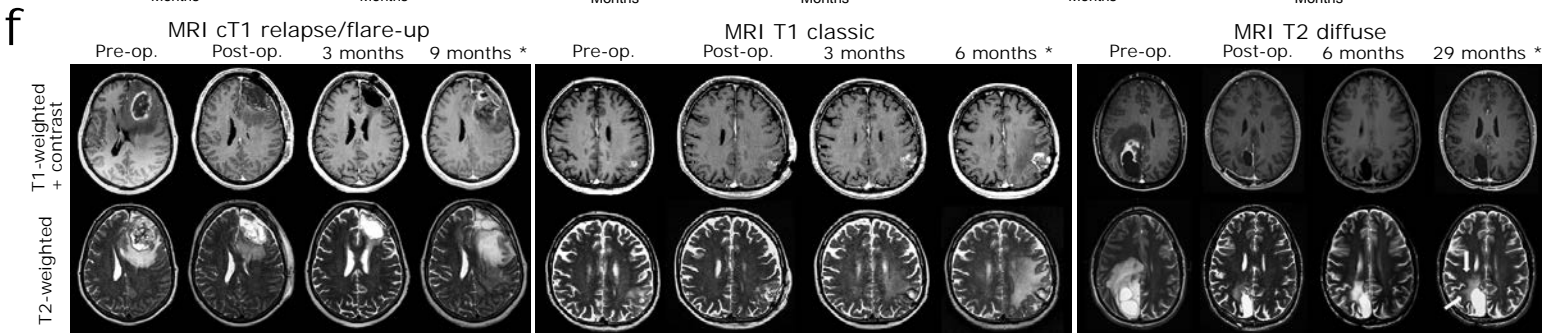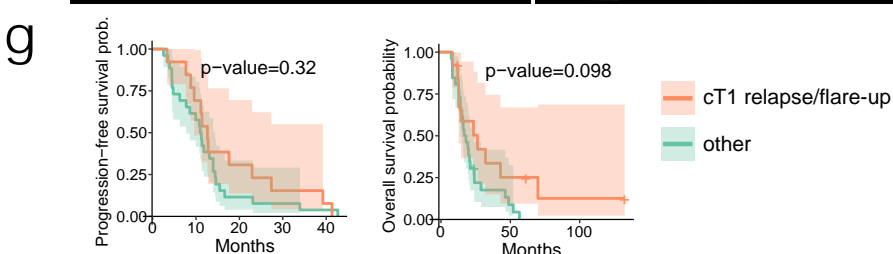

## Supplementary Figure 9

### *Association of MRI-derived tumor properties with transcriptional subtypes and disease progression*

(a) Segmented MRI illustrating the quantification of MRI-derived tumor properties. Heatmap intensity overlays indicate the extent of necrosis, contrast-enhancing (active) tumor volume, and edema – averaged across the progression cohort and normalized to a standard brain.

(b, c, d) Comparison of MRI-derived tumor properties across transcriptional subtypes and across tumor resections (1: primary tumor, 2: recurring tumor, 3: second recurrence).

(e) Kaplan-Meier plots showing progression-free and overall survival stratified by the level of necrotic and contrast-enhancing (active) tumor volume based on MRI, respectively.

(f) Time series of T1-contrast enhanced and T2/FLAIR MRI sequences, illustrating the three MRI progression types (cT1 relapse/flare-up, classic T1, T2 diffuse). ‘\*’: tumor recurrence.

(g) Kaplan-Meier plots showing progression-free and overall survival probabilities for patients in the progression cohort stratified by their MRI-derived progression types.

The number of tumor samples (N) for the association tests (panels b, c, d) is provided in Supplementary Table 4.

The number of patients (N) in the Kaplan-Meier analysis (panels e, g) is provided in Supplementary Table 3.

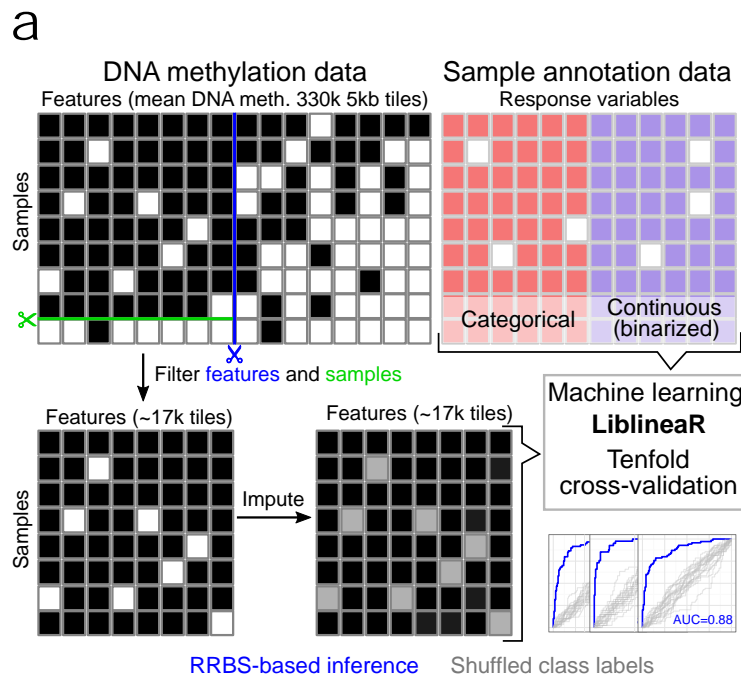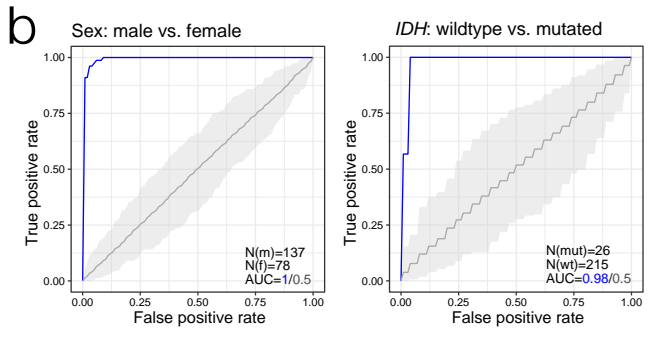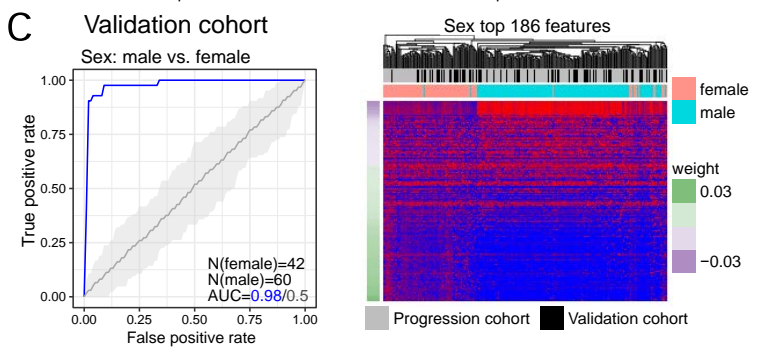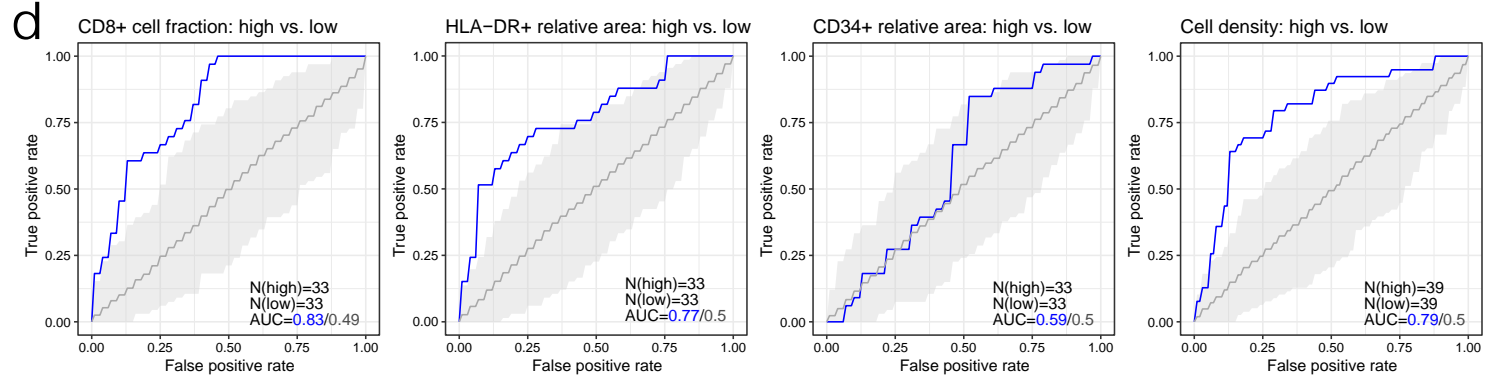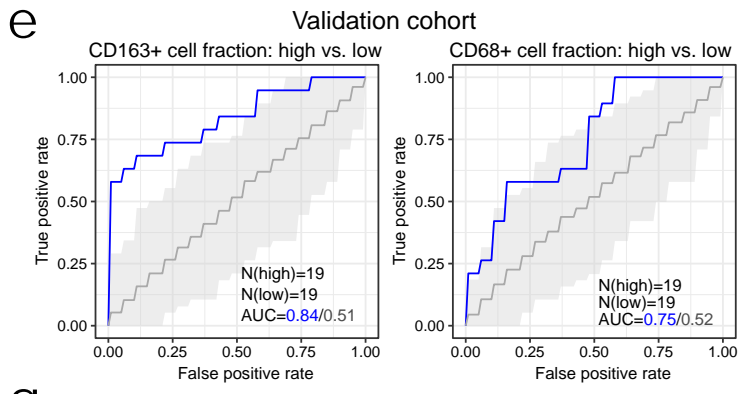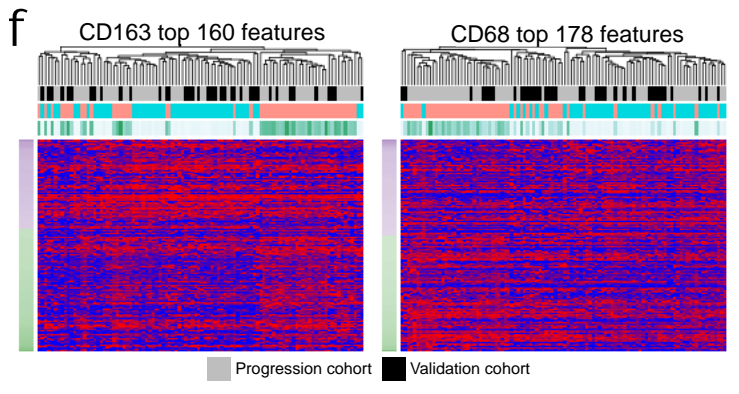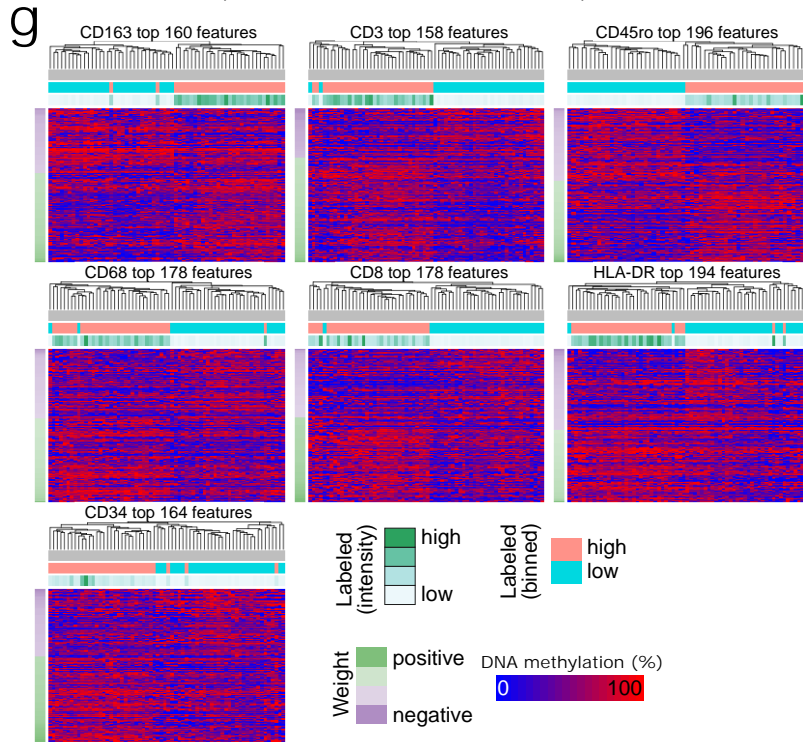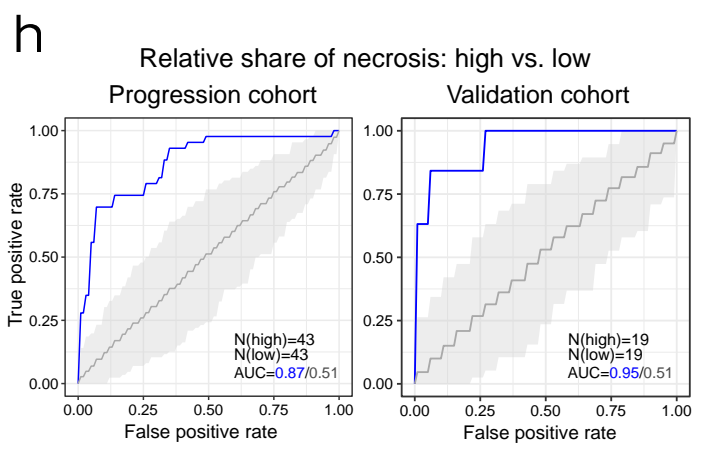

## Supplementary Figure 10

### *DNA methylation based prediction of the tumor microenvironment*

(a) Schematic illustrating the machine learning approach used to assess the predictability of various tumor properties based on the RRBS data. Black squares indicate DNA methylation values; white squares indicate missing values; grey squares indicate imputed values; and colored squares indicate annotation values.

(b) ROC curves for RRBS-based predictions of two features that are known to be predictable based on DNA methylation data (patient sex, *IDH* mutation status).

(c) ROC curve and clustered heatmap for DNA methylation based prediction of patient sex trained in the progression cohort (panel b) and applied without re-training in the validation cohort.

(d) ROC curves for the DNA methylation based prediction of several histopathologic tumor properties.

(e, f) ROC curves (e) and clustered heatmaps (f) for DNA methylation based prediction of immune cell infiltration levels (CD163, CD68) trained in the progression cohort and applied without re-training in the validation cohort.

(g) Clustered heatmap for the column-scaled DNA methylation levels of the most predictive genomic regions (5-kilobase tiling regions) from the classifiers predicting immune cell infiltration levels (CD163, CD68, CD45ro, CD3, CD8) and tumor cell characteristics (CD34, HLA-DR).

(h) ROC curves for RRBS-based prediction of the abundance of necrotic tissue in the progression cohort (left) and the validation cohort (right). For validation purposes, the classifier trained in the progression cohort was applied and evaluated in the validation cohort “as is”, without any additional training.

For the ROC curves, N denotes the number of tumor samples in each group.

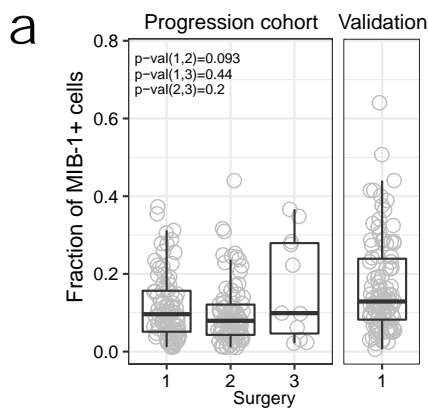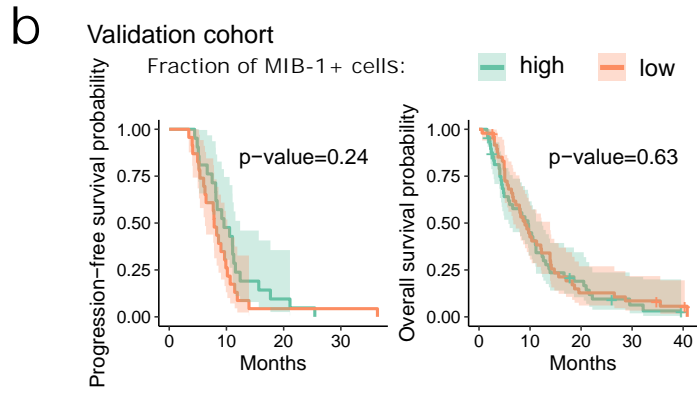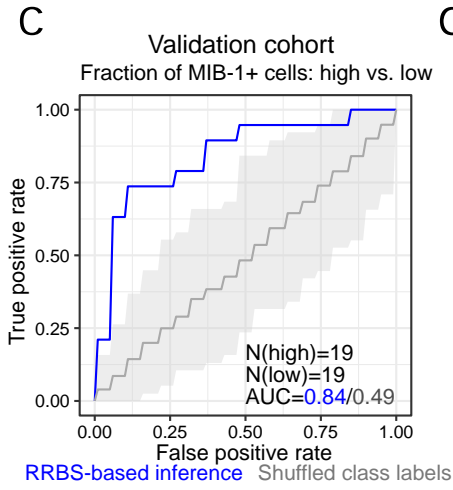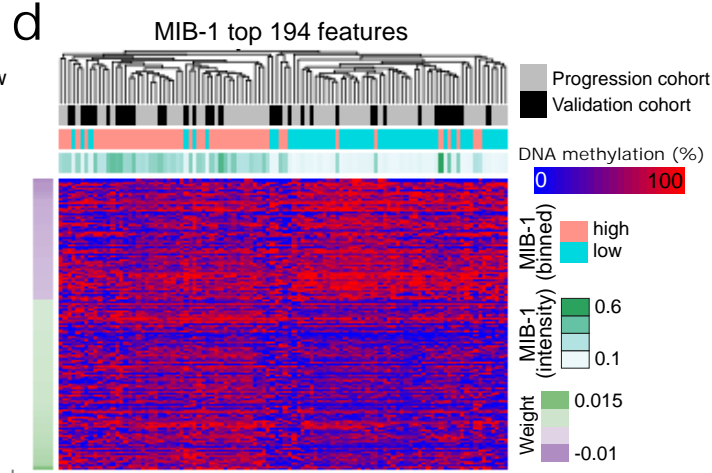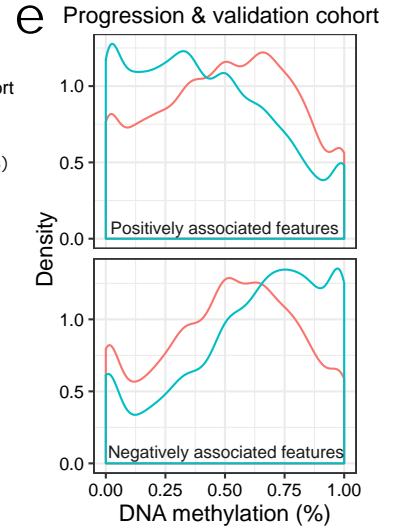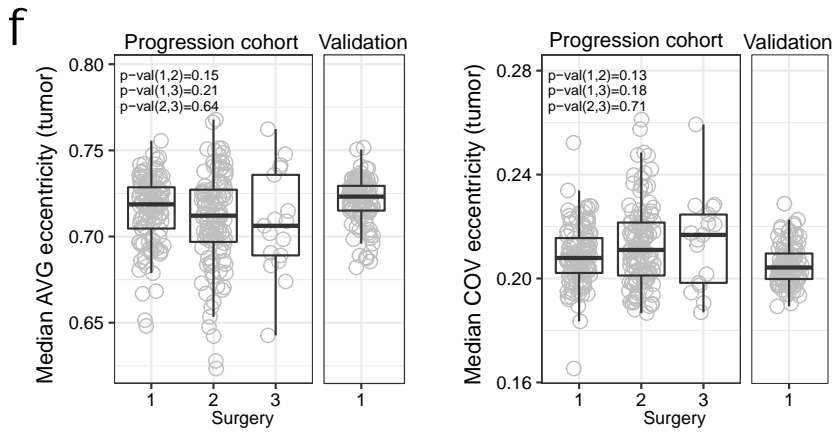

## Supplementary Figure 11

### *DNA methylation based prediction of tumor cell intrinsic properties*

- (a) Fraction of proliferating (MIB-1 positive) cells across tumor resections (1: primary tumor, 2: recurring tumor, 3: second recurrence) in the progression and validation cohort.
- (b) Kaplan-Meier plots showing progression-free and overall survival for patients in the validation cohort stratified by the fraction of proliferating (MIB-1 positive) cells. The number of patients (N) is provided in Supplementary Table 3.
- (c) ROC curves for the RRBS-based prediction of levels of proliferating (MIB-1 positive) cells trained in the progression cohort and applied without re-training in the validation cohort. N denotes the number of tumor samples in each group.
- (d) Clustered heatmaps for the column-scaled DNA methylation levels of the most predictive genomic regions (5-kilobase tiling regions) from the classifier predicting the fraction of proliferating (MIB-1 positive) cells in the progression cohort as well as the validation cohort.
- (e) Histogram showing the distribution of DNA methylation levels across the most predictive genomic regions from the classifier predicting the fraction of proliferating (MIB-1 positive) cells, displayed separately for samples with high (red) or low (blue) fractions of MIB-1 positive cells and for positively (top) or negatively (bottom) associated features as defined by the classifier-assigned weights.
- (f) Average nuclear eccentricity (AVG) and its coefficient of variation (COV) across tumor resections (1: primary tumor, 2: recurring tumor, 3: second recurrence).

The number of tumor samples (N) for the association tests (panels a, f) is provided in Supplementary Table 4.



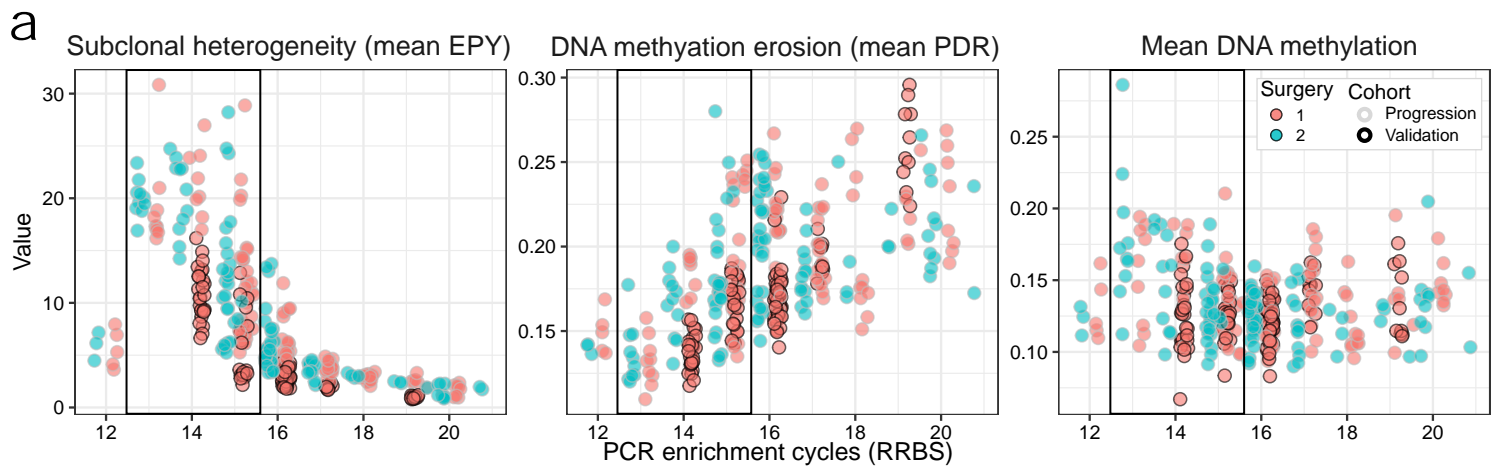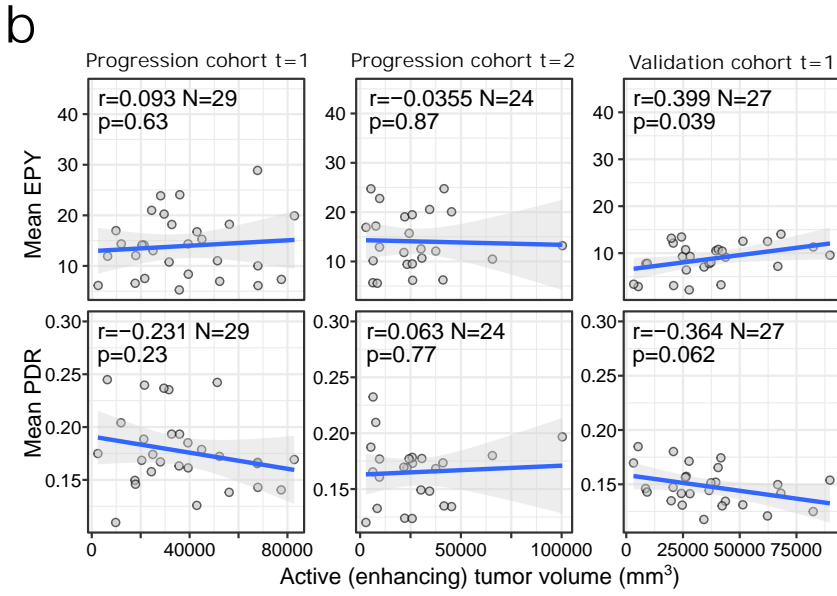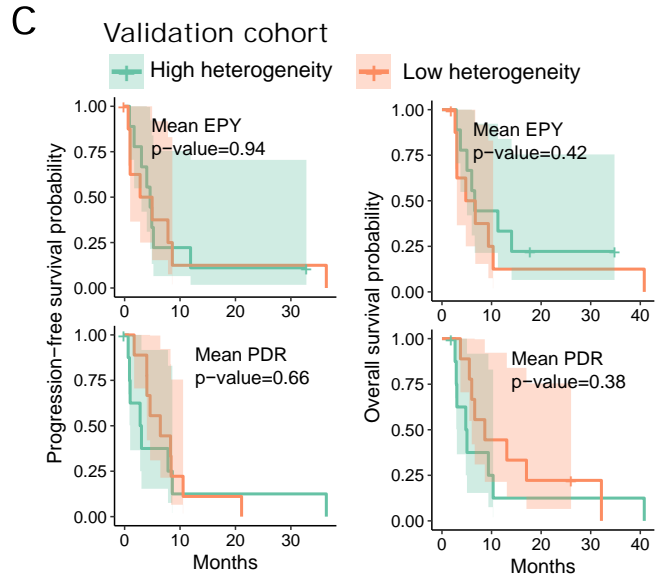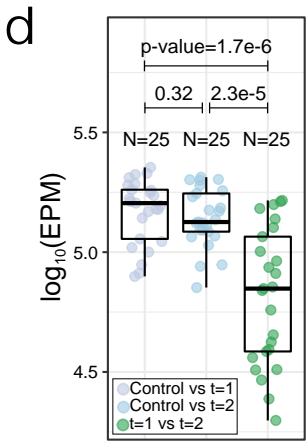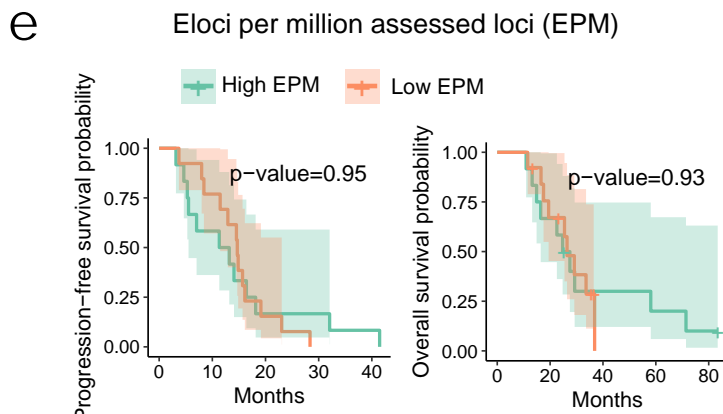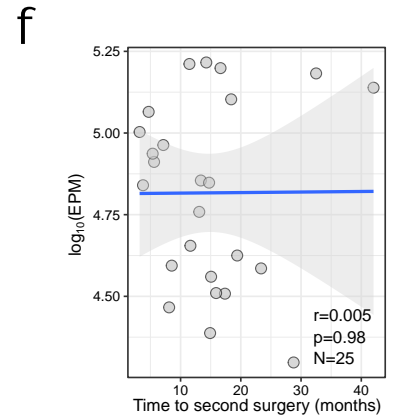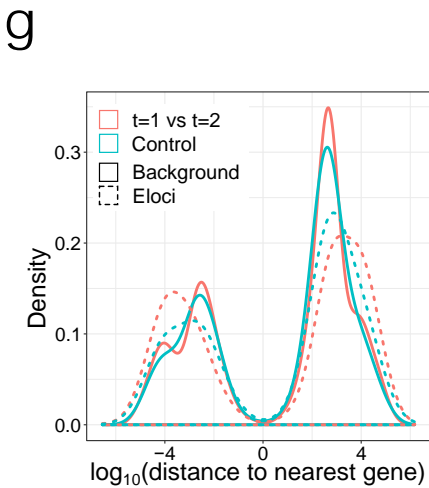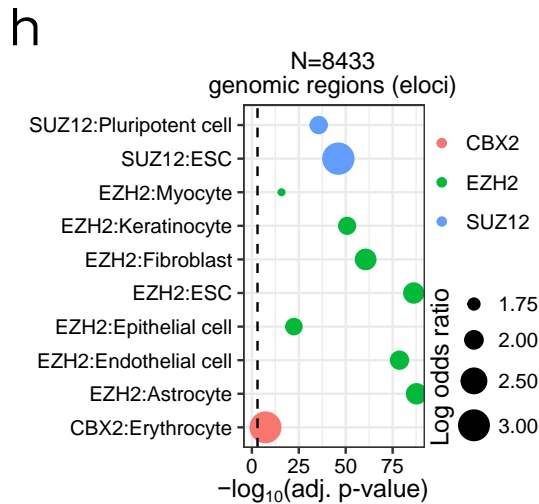

## Supplementary Figure 12

### *Analysis of DNA methylation heterogeneity in primary and recurring tumors*

- (a) Scatterplots displaying the association between PCR enrichment cycles during RRBS library preparation and DNA methylation heterogeneity (as measured by PDR or EPY) as well as mean DNA methylation levels.
- (b) Scatterplots displaying the association between DNA methylation heterogeneity (PDR, EPY) and tumor size as determined by MRI-based enhancing (active) tumor mass. r: Pearson correlation, p: p-value, t=1: primary tumor, t=2: recurring tumor.
- (c) Kaplan-Meier plots showing progression-free and overall survival for patients in the validation cohort stratified by PDR and EPY scores, respectively. For the validation cohort, recorded progression-free survival time was available only for a subset of patients, while it was estimated to be two months less than the overall survival time for those patients with missing data.
- (d) Epiallele shift between control samples (non-cancerous brain tissue), primary tumors (t=1), and recurring tumors (t=2), measured by the fraction of covered loci that show significant changes in epiallele composition between two samples (EPM: eloci per million assessed loci).
- (e) Kaplan-Meier plots showing progression-free and overall survival probabilities stratified by the degree of epiallele shift (as measured by the EPM score) between primary and recurring tumors.
- (f) Scatterplot displaying the association between epiallele shift during progression (as measured by the EPM score) and the time between first and second surgery. r: Pearson correlation, p: p-value.
- (g) Histogram showing the distribution of the distance to the nearest gene for loci assessed in the epiallele entropy comparison between control samples (non-cancerous brain tissue), primary tumors (t=1), and recurring tumors (t=2), stratified by whether or not they were identified as eloci.
- (h) LOLA region set enrichment analysis for eloci identified in the comparison of primary and recurring tumors. Region sets with an adjusted p-value below 0.001 are shown.

The number of patients (N) in the Kaplan-Meier analysis (panels c, e) is provided in Supplementary Table 3.

In the association plots (panels b, d, f), N denotes the number of tumor samples.



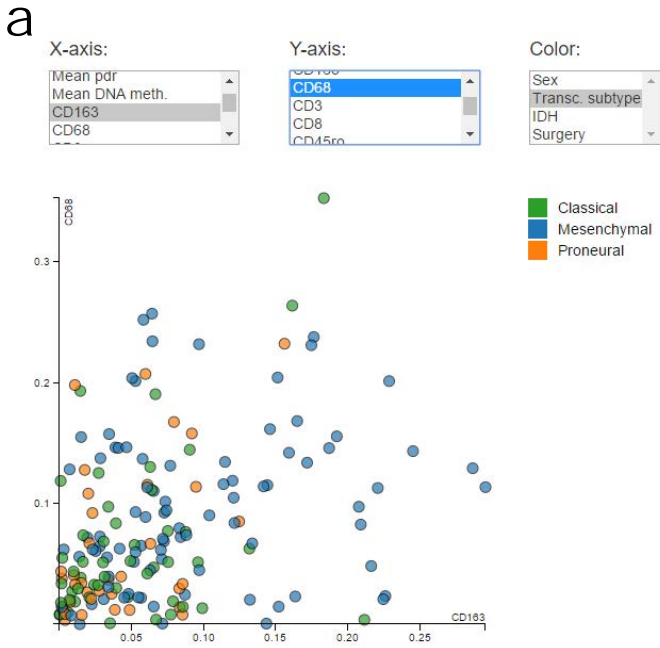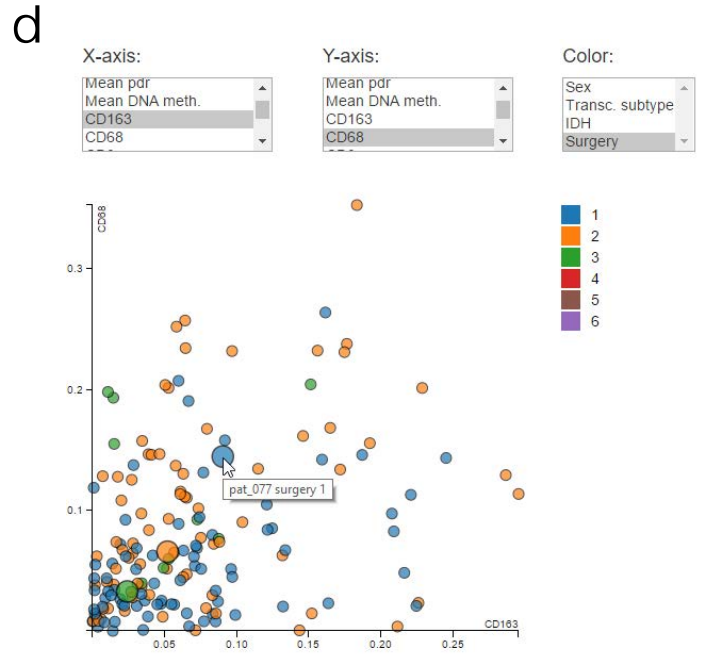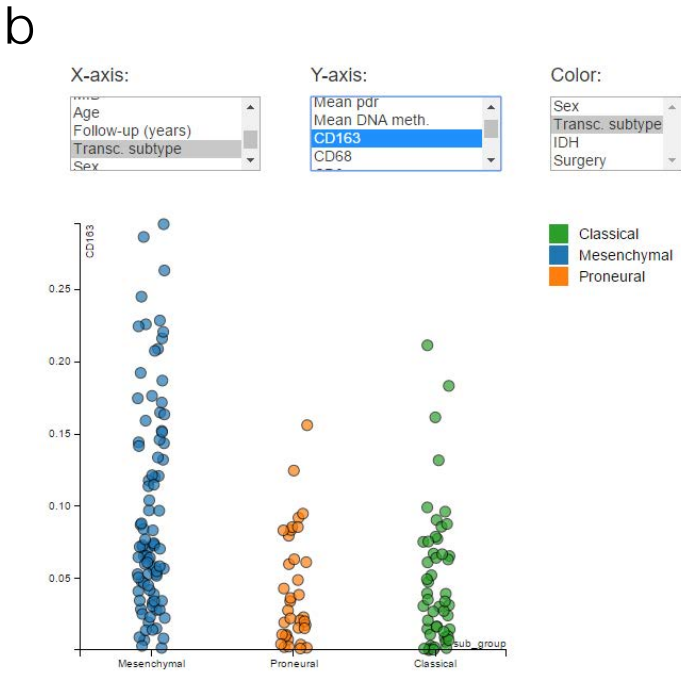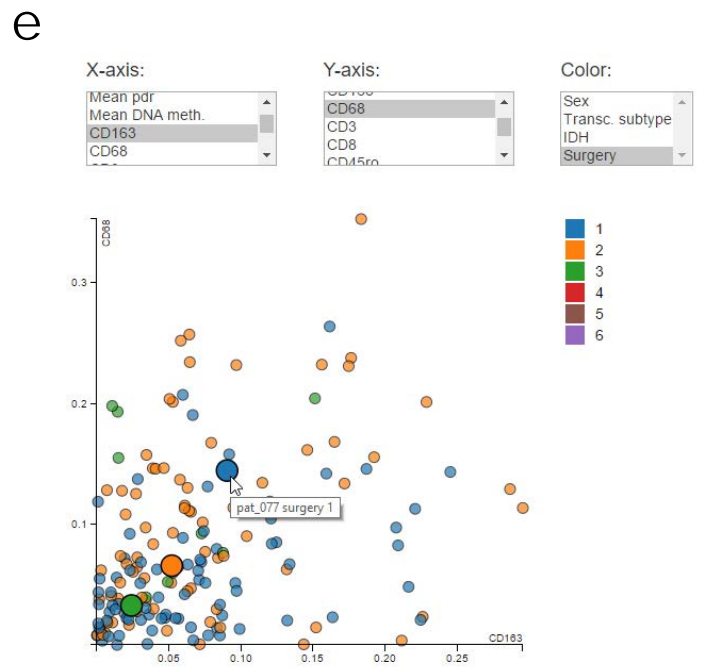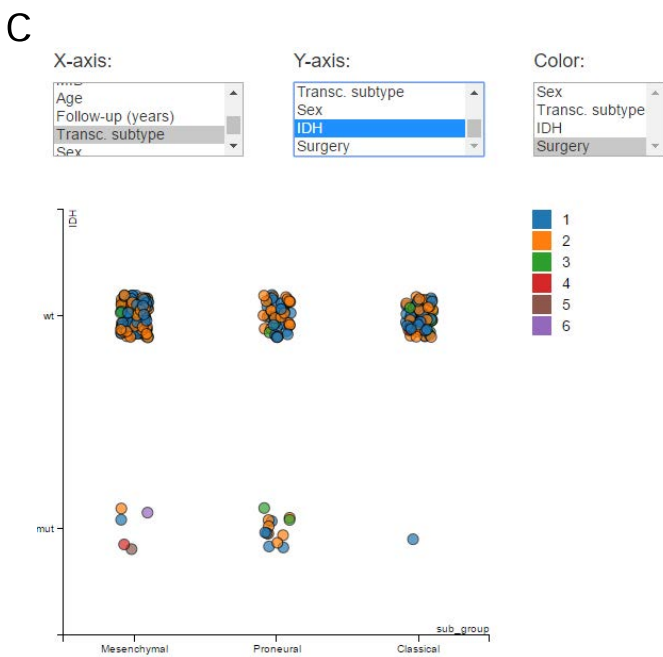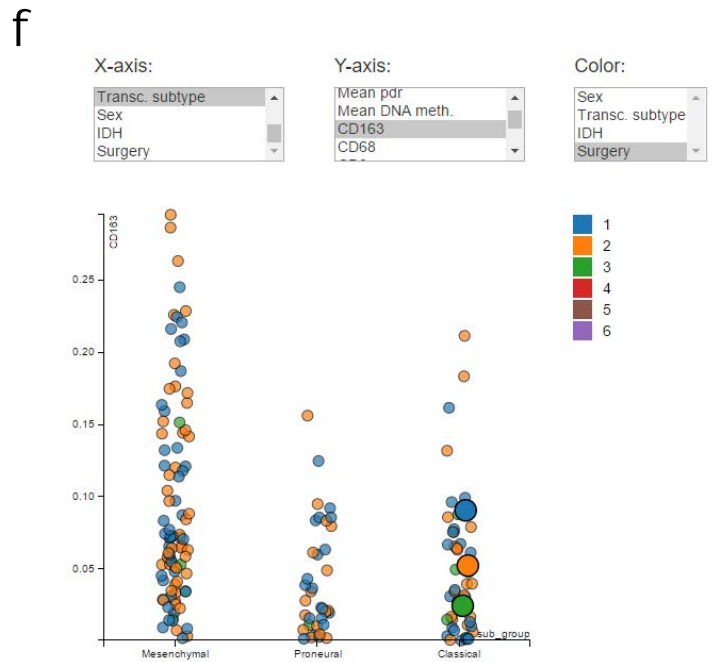

### Supplementary Figure 13

*Illustration of the graphical data explorer on the Supplementary Website (<http://glioblastoma-progression.computational-epigenetics.org/>)*

- (a) Comparison between two continuous variables.
- (b) Comparison between one continuous and one categorical variable.
- (c) Comparison between two categorical variables.
- (d) Hovering over an individual data point shows information about the specific data point. It also highlights all matched samples from the same patient.
- (e, f) Clicking on a data point locks the highlighting (e), allowing the user to follow the selected data point through additional analyses (f).

**Supplementary Table 1. Patient summary table**

Clinical annotation data for all patients and samples included in this study.

**Supplementary Table 2. RRBS summary table**

Sequencing statistics for the RRBS profiling of all samples included in this study.

**Supplementary Table 3. Survival analysis summary table**

Summary of Cox regression (sheet 1) and Kaplan-Meier survival analyses (sheet 2), assessing the association of the specified variables with overall survival (OS) and progression-free survival (PFS). The number of patients and events (N) are shown for each analysis, and 95% confidence intervals are indicated. P-values were calculated using two-sided Wald tests (for Cox regression) and two-sided log-rank tests (for Kaplan-Meier survival analysis) without adjustment for multiple testing.

**Supplementary Table 4. Association analysis summary table**

Summary of the statistical tests for association among categorical and continuous variables. The number of tumor samples (N) in each analysis as well as raw and adjusted p-values (BH: Benjamini-Hochberg, BF: Bonferroni) are indicated in the tables. P-values were calculated with a two-sided Wilcoxon rank sum test.
